# Supplementary material for: Organometallic polyphosphorus and -arsenic ligands as linkers between pre-assembled linear CuI fragments
Source: Royal Society of Chemistry journal article supplement (doi:10.1039/c4cc09845e), 2015-01-01
Supplement: c4cc09845e1.pdf [file c4cc09845e1.pdf]

## **Organometallic polyphosphorus and -arsenic ligands as linkers between pre-assembled linear Cu<sup>I</sup> fragments**

Martin Fleischmann,<sup>a</sup> Luis Dütsch,<sup>a</sup> Mehdi Elsayed Moussa,<sup>b</sup> Andrea Schindler,<sup>a</sup> Gábor Balázs,<sup>a</sup> Christophe Lescop,<sup>b\*</sup> Manfred Scheer<sup>a\*</sup>

*a Institut für Anorganische Chemie, Universität Regensburg,  
93040 Regensburg, Germany*

*b Sciences Chimiques, UMR 6226, CNRS, Université de Rennes 1,  
Campus de Beaulieu, 35042 Rennes Cedex, France*

*email of corresponding authors:*

*Manfred.scheer@chemie.uni-regensburg.de*

*Christophe.lescop@univ-rennes1.fr*

## Table of contents

|                                                                                         |    |
|-----------------------------------------------------------------------------------------|----|
| Experimental section.....                                                               | 3  |
| General considerations .....                                                            | 3  |
| Synthesis of the compounds 1-6: .....                                                   | 3  |
| Dynamic coordination behavior of the parent [Cu <sub>3</sub> ] building block (1) ..... | 5  |
| X-ray Crystallography .....                                                             | 6  |
| Structure refinement details: .....                                                     | 8  |
| Details on DFT calculations.....                                                        | 10 |

## Experimental section

### General considerations

All manipulations were carried out under an inert atmosphere of dried nitrogen using standard Schlenk and drybox techniques. THF was dried with Na. MeCN, CH<sub>2</sub>Cl<sub>2</sub> and CD<sub>2</sub>Cl<sub>2</sub> were dried over CaH<sub>2</sub>. NMR spectra were recorded in CD<sub>2</sub>Cl<sub>2</sub> on a Bruker Avance 300 MHz NMR spectrometer (<sup>1</sup>H: 300.132 MHz, <sup>31</sup>P: 121.495 MHz, <sup>13</sup>C: 75.468 MHz, <sup>19</sup>F: 282.404 MHz) or a Bruker Avance 400 MHz NMR spectrometer (<sup>1</sup>H: 400.130 MHz, <sup>31</sup>P: 161.976 MHz, <sup>13</sup>C: 100.613 MHz, <sup>11</sup>B: 128.378 MHz). IR spectra were recorded as KBr discs using a Varian FTS-800 FT-IR spectrometer. Electron spray ionization mass spectra were recorded by the MS department of the University of Regensburg on a ThermoQuest Finnigan TSQ 7000 mass spectrometer. Elemental analyses were performed by the micro analytical laboratory of the University of Regensburg.

### Synthesis of the compounds 1-6:

Preparation of [Cu<sub>3</sub>(μ-Cl)<sub>2</sub>(dpmp)<sub>2</sub>]<sup>+</sup>[BF<sub>4</sub>]<sup>-</sup> (**1**): 101 mg (2eq., 0.2 mmol) dpmp, 32 mg (1eq., 0.1 mmol) [Cu(MeCN)<sub>4</sub>][BF<sub>4</sub>] and 20 mg (2eq., 0.2 mmol) CuCl were weighed into a Schlenk flask and 10 mL CH<sub>2</sub>Cl<sub>2</sub> were added under constant stirring. The cloudy solution turns clear in the course of five minutes. After 24 hours of stirring at room temperature, this solution can either be used for further reaction with the desired P<sub>n</sub> or As<sub>n</sub> ligands or filtrated and layered with *n*-pentane. This affords colorless crystals in 73 % yield (99 mg). <sup>1</sup>H NMR (400 MHz, CD<sub>2</sub>Cl<sub>2</sub>) δ 7.70 - 6.58 (m, 50H, Ph), 3.81 - 3.00 (multiple overlapping signals, CH<sub>2</sub>); <sup>31</sup>P{<sup>1</sup>H} NMR (162.0 MHz, CD<sub>2</sub>Cl<sub>2</sub>) δ -6.54 (m, small signal), -11.17 (m, small signal), -14.30 (m, RPPH<sub>2</sub>), -17.27 (br, R<sub>2</sub>PPh); <sup>11</sup>B{<sup>1</sup>H} NMR (128.4 MHz, CD<sub>2</sub>Cl<sub>2</sub>) δ -0.95 (<sup>0</sup>BF<sub>4</sub>); <sup>13</sup>C{<sup>1</sup>H} NMR (100.6 MHz, CD<sub>2</sub>Cl<sub>2</sub>) δ 133.65 - 127.49 (multiple signals, Ph), 28.16 (CH<sub>2</sub>). IR(KBr) cm<sup>-1</sup>: 3072 (vw), 3052 (w), 3020 (vw), 2955 (vw), 2924 (vw), 2896 (vw), 2854 (vw), 1587 (vw), 1574 (vw), 1485 (m), 1436 (s), 1377 (m), 1333 (vw), 1310 (vw), 1278 (vw), 1189 (vw), 1159 (vw), 1099 (s), 1084 (m), 1065 (m), 1028 (m) 999 (m), 794 (m), 739 (s), 691 (s).

General preparation procedure of the compounds **2-5**: A solution of **1** was prepared as described above. After 24 hours of stirring the P<sub>n</sub> or As<sub>n</sub> ligand complex (0.1 mmol, 1eq.) was dissolved in a small amount of CH<sub>2</sub>Cl<sub>2</sub> and added dropwise to this solution. This reaction was degassed five times and stirred for another 24 hours. Afterwards the solution was filtered and *n*-pentane diffusion into the solution afforded the crystalline products in a course of several days.

Isolation of [Cu<sub>3</sub>(μ-Cl)<sub>2</sub>(dpmp)<sub>2</sub>]{(μ<sub>3</sub>,η<sup>1</sup>:η<sup>2</sup>:η<sup>2</sup>-P<sub>2</sub>)Mo<sub>2</sub>(CO)<sub>2</sub>Cp<sub>2</sub>}[BF<sub>4</sub>] (**2**): 50 mg **A1** (1 eq., 0.1 mmol) added in a small amount of CH<sub>2</sub>Cl<sub>2</sub> to a 1:1 stoichiometric solution of **1**. After 24 hours stirring, subsequent filtration and layering with *n*-pentane, compound **2** was isolated as orange to red plates in 51 % yield (95 mg, 0.051 mmol). <sup>1</sup>H NMR (300 MHz, CD<sub>2</sub>Cl<sub>2</sub>) δ 7.70 - 6.55 (m, 50H, Ph), 5.11 (s, 9H, Cp), 3.63 (m, 3.5H, CH<sub>2</sub>), 3.38 (m, 1H, CH<sub>2</sub>), 3.10 (m, 3.5H, CH<sub>2</sub>); <sup>31</sup>P{<sup>1</sup>H} NMR (121.5 MHz, CD<sub>2</sub>Cl<sub>2</sub>) δ -6.68 (br m, small signal), -11.35 (br m, small signal), -15.28 (m, RPPH<sub>2</sub>), -19.72 (br, R<sub>2</sub>PPh), -65.60 (s, P<sub>2</sub>); <sup>19</sup>F NMR (282.4 MHz, CD<sub>2</sub>Cl<sub>2</sub>) δ -148.75 (<sup>10</sup>BF<sub>4</sub>), -148.81 (<sup>11</sup>BF<sub>4</sub>); <sup>13</sup>C{<sup>1</sup>H} NMR (75.5 MHz, CD<sub>2</sub>Cl<sub>2</sub>) δ 226.53 (CO), 134.61 - 128.15 (multiple signals, Ph), 87.52 (Cp), 30.48 (CH<sub>2</sub>). Positive ion MS, q/m (%): 1273.2 (100) [Cu<sub>3</sub>Cl<sub>2</sub>(dpmp)<sub>2</sub>]<sup>+</sup>. Negative ion MS, q/m (%): 1447.3 (100) [Cu<sub>3</sub>Cl<sub>2</sub>(dpmp)<sub>2</sub>(BF<sub>4</sub>)<sub>2</sub>]<sup>-</sup>. IR(KBr) cm<sup>-1</sup>: 3117 (vw), 3079 (vw), 3052 (w), 3005 (w), 2987 (w), 2954 (vw), 2917 (vw), 2851 (vw), 2000 (m), 1991 (m), 1965 (vs), 1925 (s), 1908 (s), 1848 (m), 1629 (w), 1485 (m), 1435 (s), 1377 (w), 1098 (s), 1084 (s). Anal. calcd for Cu<sub>3</sub>Cl<sub>2</sub>(dpmp)<sub>2</sub>{Cp<sub>2</sub>Mo<sub>2</sub>(CO)<sub>4</sub>P<sub>2</sub>}(BF<sub>4</sub>)(CH<sub>2</sub>Cl<sub>2</sub>)<sub>0.3</sub>: C, 49.95; H, 3.67. Found: C, 49.98; H, 3.62.

Isolation of  $[\text{Cu}_3(\mu\text{-Cl})_2(\text{dpmp})_2\{(\mu_3, \eta^1:\eta^2:\eta^2\text{-As}_2)\text{Mo}_2(\text{CO})_2\text{Cp}_2\}][\text{BF}_4]$  (**3**): 59 mg **A2** (1 eq., 0.1 mmol) added in a small amount of  $\text{CH}_2\text{Cl}_2$  to a 1:1 stoichiometric solution of **1**. After 24 hours stirring, subsequent filtration and layering with *n*-pentane, compound **3** was isolated as dark red blocks in 43 % yield (84 mg, 0.043 mmol).  $^1\text{H}$  NMR (300 MHz,  $\text{CD}_2\text{Cl}_2$ )  $\delta$  7.72 - 6.54 (m, 50H, Ph), 5.11 (s, 8H, Cp), 3.81 - 3.00 (multiple overlapping signals,  $\text{CH}_2$ );  $^{31}\text{P}\{^1\text{H}\}$  NMR (121.5 MHz,  $\text{CD}_2\text{Cl}_2$ )  $\delta$  -7.12 (br m, small signal), -11.35 (br m, small signal), -14.53 (m,  $\text{RPPH}_2$ ), -17.42 (br,  $\text{R}_2\text{PPh}$ );  $^{19}\text{F}$  NMR (282.4 MHz,  $\text{CD}_2\text{Cl}_2$ )  $\delta$  -149.67 ( $^{10}\text{BF}_4$ ), -149.73 ( $^{11}\text{BF}_4$ );  $^{13}\text{C}\{^1\text{H}\}$  NMR (75.5 MHz,  $\text{CD}_2\text{Cl}_2$ ), 131.05 - 126.25 (multiple signals, Ph), 84.99 (Cp). Positive ion MS,  $q/m$  (%): 1273.0 (100)  $[\text{Cu}_3\text{Cl}_2(\text{dpmp})_2]^+$ , 1879.4 (0.55)  $[\text{Cu}_4\text{Cl}_3(\text{dpmp})_3]^+$ , 1979.2 (0.25)  $[\text{Cu}_5\text{Cl}_4(\text{dpmp})_3]^+$ . IR(KBr)  $\text{cm}^{-1}$ : 3081 (vw), 3053 (w), 2955 (vw), 2919 (vw) 2898 (vw), 2851 (vw), 1978 (w), 1954 (vs), 1913 (s), 1896 (s), 1630 (w), 1485 (w), 1435 (m), 1378 (w), 1098 (m), 1084 (m). Anal. calcd for  $\text{Cu}_3\text{Cl}_2(\text{dpmp})_2\{(\text{Cp}_2\text{Mo}_2(\text{CO})_4\text{As}_2)(\text{BF}_4)(\text{CH}_2\text{Cl}_2)\}$ : C, 46.74; H, 3.48. Found: C, 46.88; H, 3.65.

Isolation of  $[\text{Cu}_3(\mu\text{-Cl})_2(\text{dpmp})_2\{(\mu_3, \eta^1:\eta^1:\eta^5\text{-P}_5)\text{FeCp}^*\}]_n[\text{BF}_4]_n$  (**4**): 35 mg **A1** (1 eq., 0.1 mmol) added in a small amount of  $\text{CH}_2\text{Cl}_2$  to a 1:1 stoichiometric solution of **1**. After 24 hours stirring, subsequent filtration and layering with *n*-pentane, compound **4** was isolated as green rods in 47 % yield (81 mg, 0.047 mmol).  $^1\text{H}$  NMR (300 MHz,  $\text{CD}_2\text{Cl}_2$ )  $\delta$  7.72 - 6.55 (m, 50H, Ph), 3.81 - 3.01 (multiple overlapping signals,  $\text{CH}_2$ ), 1.42 (s, 14H,  $\text{Cp}^*$ );  $^{31}\text{P}\{^1\text{H}\}$  NMR (121.5 MHz,  $\text{CD}_2\text{Cl}_2$ )  $\delta$  149.91 (s,  $\text{P}_5$ ), -6.92 (br m, small signal), -11.33 (br m, small signal), -14.62 (m,  $\text{RPPH}_2$ ), -18.35 (br,  $\text{R}_2\text{PPh}$ );  $^{19}\text{F}$  NMR (282.4 MHz,  $\text{CD}_2\text{Cl}_2$ )  $\delta$  -149.35 ( $^{10}\text{BF}_4$ ), -149.40 ( $^{11}\text{BF}_4$ );  $^{13}\text{C}\{^1\text{H}\}$  NMR (75.5 MHz,  $\text{CD}_2\text{Cl}_2$ ) 134.84 - 128.31 (multiple signals, Ph), 91.82 ( $\text{Cp}^*$ ) 30.23 ( $\text{CH}_2$ ), 11.06 ( $\text{CH}_3$ ). Positive ion MS,  $q/m$  (%): 1272.9 (100)  $[\text{Cu}_3\text{Cl}_2(\text{dpmp})_2]^+$ , 1782.3 (3.0)  $[\text{Cu}_3\text{Cl}_2(\text{dpmp})_3]^+$ . Negative ion MS,  $q/m$  (%): 87.1 (100)  $[\text{BF}_4]^-$ . IR(KBr)  $\text{cm}^{-1}$ : 3072 (vw), 3051 (w), 3017 (vw), 2954 (vw), 2908 (vw) 1436 (m), 1376 (w), 1124 (w), 1097 (w), 1084 (m), 1026 (w) 1000 (w), 791 (w), 738 (m), 690 (m), 669 (m). Anal. calcd for  $\text{Cu}_3\text{Cl}_2(\text{dpmp})_2\{\text{Cp}^*\text{FeP}_5\}(\text{BF}_4)(\text{CH}_2\text{Cl}_2)_{1.3}$ : C, 49.76; H, 4.19. Found: C, 49.73; H, 4.26.

Isolation of  $[\text{Cu}_3(\mu\text{-Cl})_2(\text{dpmp})_2\{(\mu_3, \eta^1:\eta^1:\eta^5\text{-As}_5)\text{FeCp}^*\}]_n[\text{BF}_4]_n$  (**5**): 57 mg **B2** (1 eq., 0.1 mmol) added in a small amount of  $\text{CH}_2\text{Cl}_2$  to a 1:1 stoichiometric solution of **1** which resulted in an immediate color change from olive green color of complex **B2** to dark red. After 24 hours stirring, subsequent filtration and layering with *n*-pentane, compound **5** was isolated as brown blocks in 36 % yield (70 mg, 0.036 mmol).  $^1\text{H}$  NMR (300 MHz,  $\text{CD}_2\text{Cl}_2$ )  $\delta$  7.70 - 6.55 (m, 50H, Ph), 3.81 - 3.03 (multiple overlapping signals,  $\text{CH}_2$ ), 1.37 (s, 13H,  $\text{Cp}^*$ );  $^{31}\text{P}\{^1\text{H}\}$  NMR (121.5 MHz,  $\text{CD}_2\text{Cl}_2$ )  $\delta$  -6.82 (br m, small signal), -11.34 (br m, small signal), -14.44 (m,  $\text{RPPH}_2$ ), -17.25 (br,  $\text{R}_2\text{PPh}$ );  $^{19}\text{F}$  NMR (282.4 MHz,  $\text{CD}_2\text{Cl}_2$ )  $\delta$  -149.36 ( $^{10}\text{BF}_4$ ), -149.41 ( $^{11}\text{BF}_4$ );  $^{13}\text{C}\{^1\text{H}\}$  NMR (75.5 MHz,  $\text{CD}_2\text{Cl}_2$ ) 134.71 - 128.06 (multiple signals, Ph), 88.01 ( $\text{Cp}^*$ ) 30.32 ( $\text{CH}_2$ ), 12.27 ( $\text{CH}_3$ ). Positive ion MS,  $q/m$  (%): 2583.6, (20)  $[\text{Cu}_6\text{Cl}_5(\text{dpmp})_4]^+$ ; 1977.8, (10)  $[\text{Cu}_5\text{Cl}_4(\text{dpmp})_3]^+$ ; 1879.6, (5)  $[\text{Cu}_4\text{Cl}_3(\text{dpmp})_3]^+$ ; 1273.0, (100)  $[\text{Cu}_3\text{Cl}_2(\text{dpmp})_2]^+$ ; 665.1, (5)  $[\text{Cu}_2\text{Cl}(\text{dpmp})]^+$ ; 619.2, (17)  $[\text{Cu}_3\text{Cl}(\text{dpmp})_2]^{2+}$ ; 569.1, (3)  $[\text{Cu}(\text{dpmp})]^+$ . Negative ion MS,  $q/m$  (%): 87.2, (100)  $[\text{BF}_4]^-$ . IR(KBr)  $\text{cm}^{-1}$ : 3072 (w), 3051 (m), 3019 (vw), 3005 (vw), 2986 (vw), 2952 (w), 2899 (w), 2360 (vw), 2342 (vw), 1625 (w), 1587 (w), 1574 (w), 1484 (m), 1435 (vs), 1375 (m), 1124 (m), 1098 (s), 1084 (vs), 1064 (s), 1026 (m), 999 (m). Anal. calcd for  $\text{Cu}_3\text{Cl}_2(\text{dpmp})_2\{\text{Cp}^*\text{FeAs}_5\}(\text{BF}_4)(\text{CH}_2\text{Cl}_2)$ : C, 44.77; H, 3.76. Found: C, 44.80; H, 4.01.

Preparation of  $[\text{Cu}_3(\mu\text{-Cl})_2(\text{dpmp})_2(\text{MeCN})_2]^+[\text{BF}_4]^-$  (**6**): The literature reports of one structurally characterized related trinuclear  $\text{Cu}^I$  complex ( $[\text{Cu}_3(\mu\text{-Cl})_2(\text{dpmp})_2(\text{MeCN})_2]^+[\text{ClO}_4]^- \cdot \text{H}_2\text{O}$ ).<sup>[1]</sup> We were able to synthesize the same cationic complex with  $[\text{BF}_4]^-$  as an anion. Therefore we followed a one-pot synthesis to obtain compound **1** with two terminal MeCN ligands.

101 mg (2eq., 0.2 mmol) dpmp, 32 mg (1eq., 0.1 mmol)  $[\text{Cu}(\text{MeCN})_4][\text{BF}_4]$  and 20 mg (2eq., 0.2 mmol) CuCl were weighed into a Schlenk flask and a solvent mixture of 8 mL THF and 2 mL MeCN were added under constant stirring. The compounds dissolved to form a clear and colorless solution in about 30 to 60 seconds. After 24 hours of stirring at room temperature the solution was filtered vapor diffusion of  $\text{Et}_2\text{O}$  into the solution affords colorless crystal in the course of some days. The mother liquor is decanted off the crystals. The crystals are washed with  $\text{Et}_2\text{O}$  a few times and dried in vacuum for 30 minutes. After this time about 0.6 equivalents of the coordinated MeCN ligands could be removed from the crystals as indicated by elemental analysis. By grinding the sample and drying it in vacuum for another 2 hours, the MeCN could completely be removed. Yield 66% (95 mg)

Sample dried for 30 minutes:

Anal. calcd for  $\text{Cu}_3\text{Cl}_2(\text{dpmp})_2(\text{MeCN})_{1.4}(\text{BF}_4)$ : C, 56.55; H, 4.42; N, 1.38. Found: C, 56.55; H, 4.70; N, 1.35.

Sample grinded and dried for 2 hours:

Anal. calcd for  $\text{Cu}_3\text{Cl}_2(\text{dpmp})_2(\text{BF}_4)$ : C, 56.47; H, 4.29; N, 0.00. Found: C, 56.27; H, 4.35; N, 0.00.

Positive ion MS,  $q/m$  (%): 1273.4 (100)  $[\text{Cu}_3\text{Cl}_2(\text{dpmp})_2]^+$ , 1175.3 (7)  $[\text{Cu}_2\text{Cl}_1(\text{dpmp})_2]^+$ , 669.0 (10)  $[\text{Cu}_2\text{Cl}(\text{dpmp})]^+$ , 569.1 (8)  $[\text{Cu}(\text{dpmp})]^+$ . Negative ion MS,  $q/m$  (%): 87.1 (100)  $[\text{BF}_4]^-$ . IR(KBr)  $\text{cm}^{-1}$ : 3052 (w), 2956 (vw), 2895 (vw), 1587 (vw), 1574 (vw), 1485 (m), 1436 (s), 1377 (m), 1333 (vw), 1309 (vw), 1278 (vw), 1189 (vw), 1159 (vw), 1099 (s), 1084 (s), 1028 (m), 1000 (m), 793 (m), 738 (s), 691 (s).

### **Dynamic coordination behavior of the parent $[\text{Cu}_3]$ building block (1)**

The parent compound  $[\text{Cu}_3(\mu\text{-Cl})_2(\text{dpmp})_2]^+[\text{BF}_4]^-$  (**1**) is prepared in a straightforward manner by dissolving two equivalents dpmp and CuCl together with one equivalent of  $[\text{Cu}(\text{MeCN})_4][\text{BF}_4]$ . The use of MeCN/THF (1:5) mixtures as solvent afforded the desired building block **1** with terminal MeCN ligands  $[\text{Cu}_3(\mu\text{-Cl})_2(\text{dpmp})_2(\text{MeCN})_2]^+[\text{BF}_4]^-$  (**6**) (see Figure 1 for a representation of the solid state structure). A related compound  $[\text{Cu}_3(\mu\text{-Cl})_2(\text{dpmp})_2(\text{MeCN})_2]^+[\text{ClO}_4]^- \cdot \text{H}_2\text{O}$  was described in the literature before, following a different synthetic approach.<sup>[i]</sup> When the substitution of the labile MeCN ligands by our  $\text{P}_n$  or  $\text{As}_n$  ligand complexes was tried in MeCN/THF mixtures we could never observe any coordination to the Cu ions.

Therefore, we prepared the parent compound **1** in pure  $\text{CH}_2\text{Cl}_2$  without THF or MeCN addition. After stirring CuCl, dpmp and  $[\text{Cu}(\text{MeCN})_4][\text{BF}_4]$  in  $\text{CH}_2\text{Cl}_2$  and subsequent vapor diffusion of *n*-pentane into the solution, we were able to isolate the parent cationic building block  $[\text{Cu}_3(\mu\text{-Cl})_2(\text{dpmp})_2]^+[\text{BF}_4]^-$  (**1**) without MeCN ligands. This was an astonishing result, since the central cationic cluster  $[\text{Cu}_3(\mu\text{-Cl})_2(\text{dpmp})_2]^+$  is still intact, but is now also exhibiting two vacant coordination sites on the outer Cu ions. Consequently, we performed our following coordination chemistry only in  $\text{CH}_2\text{Cl}_2$  solution.

When crystals of the pure  $[\text{Cu}_3(\mu\text{-Cl})_2(\text{dpmp})_2]^+$  building block ( $=[\text{Cu}_3]$ ) are dissolved in  $\text{CD}_2\text{Cl}_2$  at  $-80^\circ\text{C}$  the  $[\text{Cu}_3]$  cluster remains intact and two broad signals can be identified in the  $^{31}\text{P}\{^1\text{H}\}$  NMR spectrum at  $-15.3$  ppm and at  $-17.4$  ppm in a 2:1 ratio for the dpmp ligand. The  $^1\text{H}$  NMR spectrum at  $-80^\circ\text{C}$  shows next to the aromatic protons of the phenyl rings two broad signals at 3.06 ppm and at 3.58 ppm for the diastereotopic atoms of the methylene groups of the bridging dpmp ligands. When the solution is warmed up in the NMR spectrometer the  $[\text{Cu}_3]$  cluster seems to show some dynamic behavior above  $-20^\circ\text{C}$  which can be monitored by new signals arising next to the ones of the  $[\text{Cu}_3]$  cluster which is still the major part in solution even at room temperature. When the same solution is cooled down again, the  $^1\text{H}$  and the  $^{31}\text{P}\{^1\text{H}\}$  NMR spectra do not change and do not show the initial

signals for the pure  $[\text{Cu}_3]$  cluster. Thus, we assume a dynamic coordination behavior that needs some thermal energy for breaking the dative Cu–P bonds and cooling down the solution of the dissociated compounds will not reverse the process to form the desired coordination complexes. This formation can be realized during the crystallization process by the addition of the investigated  $\text{P}_n$  and  $\text{As}_n$  ligand complexes to the  $[\text{Cu}_3]$  building block in  $\text{CH}_2\text{Cl}_2$  and subsequent vapor diffusion of  $n$ -pentane into the solution. This affords the desired coordination complexes formed from the  $[\text{Cu}_3]$  cluster coordinated by the P or As atoms of the  $\text{E}_n$  ligands. The  $^1\text{H}$  NMR spectra of the isolated products in  $\text{CD}_2\text{Cl}_2$  at room temperature show the same set of signals as the pure  $[\text{Cu}_3]$  building block and an additional singlet for the Cp rings of  $[\text{Cp}_2\text{Mo}_2(\text{CO})_4(\mu, \eta^2: \eta^2\text{-E}_2)]$  ( $\text{E} = \text{P}(\mathbf{A1})$ ,  $\text{As}(\mathbf{A2})$ ) or the Cp\* ring of  $[\text{Cp}^*\text{Fe}(\eta^5\text{-E}_5)]$  ( $\text{E} = \text{P}(\mathbf{B1})$ ,  $\text{As}(\mathbf{B2})$ ). The  $^{31}\text{P}\{^1\text{H}\}$  NMR spectrum of complex **2** additionally shows a singlet at  $-65.6$  ppm for the  $\text{P}_2$  ligand **A1** which is shifted 21 ppm upfield compared to the free complex **1**. The  $^{31}\text{P}\{^1\text{H}\}$  NMR spectrum of the one-dimensional coordination polymer **4** also shows a singlet at 149.9 ppm for the  $\text{P}_5$  ring of complex **B1** which is shifted 3 ppm upfield compared to the free ligand **B1**. The observed singlets for the  $\text{P}_n$  ligands in the  $^{31}\text{P}\{^1\text{H}\}$  NMR spectra of the products **2** and **4** show that the P atoms are equivalent on the NMR timescale and show a dynamic behavior.

All isolated compounds (**1-6**) always exhibit the cationic building block  $[\text{Cu}_3(\mu\text{-Cl})_2(\text{dpmp})_2]^+$  and we never saw any other combination of  $\text{Cu}^+$  and the dpmp ligand in the solid state. The  $^1\text{H}$  NMR as well as the  $^{31}\text{P}$  NMR spectra of isolated crystals of the compounds **1-5** dissolved in  $\text{CD}_2\text{Cl}_2$  at room temperature show a dynamic coordination behavior and suggest that the well-defined arrangement of the described coordination units in the solid state structures are formed during the crystallization process. From these observations we can conclude, that the  $[\text{Cu}_3(\mu\text{-Cl})_2(\text{dpmp})_2]^+$  building block is a very stable aggregate, since it is exclusively observed in the solid state, but in solution different  $\text{Cu}^+$  species with dpmp and  $\text{Cl}^-$  ligands are in equilibrium.

## X-ray Crystallography

All crystal preparations were done under mineral oil. The data collection was either performed on an Agilent Technologies SuperNova diffractometer equipped with a micro focus Cu X-ray source, an Agilent Technologies Gemini R Ultra equipped with sealed tube Mo and Cu X-ray sources or on a Bruker Apex II diffractometer equipped with a Mo X-ray source. All measurements were performed at 150 K or at 123 K by nitrogen cooling. The structure least square refinement was done with the SHELX program package<sup>ii</sup> against  $F^2$ .

**Table 1. Crystallographic details for the compounds 1-3.**

|                                                                             | 1                                                                                              | 2                                                                                                                             | 3                                                                                                                                             |
|-----------------------------------------------------------------------------|------------------------------------------------------------------------------------------------|-------------------------------------------------------------------------------------------------------------------------------|-----------------------------------------------------------------------------------------------------------------------------------------------|
| Empirical formula                                                           | C <sub>66</sub> H <sub>62</sub> BCl <sub>6</sub> Cu <sub>3</sub> F <sub>4</sub> P <sub>6</sub> | C <sub>80</sub> H <sub>72</sub> BCl <sub>6</sub> Cu <sub>3</sub> F <sub>4</sub> Mo <sub>2</sub> O <sub>4</sub> P <sub>8</sub> | C <sub>80</sub> H <sub>72</sub> As <sub>2</sub> BCl <sub>6</sub> Cu <sub>3</sub> F <sub>4</sub> Mo <sub>2</sub> O <sub>4</sub> P <sub>6</sub> |
| <i>M</i> [gmol <sup>-1</sup> ]                                              | 1531.14                                                                                        | 2027.18                                                                                                                       | 2115.08                                                                                                                                       |
| Crystal size [mm]                                                           | 0.18 × 0.13 × 0.04                                                                             | 0.17 × 0.10 × 0.02                                                                                                            | 0.27 × 0.14 × 0.03                                                                                                                            |
| <i>T</i> [K]                                                                | 123(1)                                                                                         | 123(1)                                                                                                                        | 123(1)                                                                                                                                        |
| <i>λ</i> [Å]                                                                | 1.54178                                                                                        | 1.54178                                                                                                                       | 1.54178                                                                                                                                       |
| crystal system                                                              | monoclinic                                                                                     | monoclinic                                                                                                                    | monoclinic                                                                                                                                    |
| space group                                                                 | <i>P</i> 2 <sub>1</sub> / <i>n</i>                                                             | <i>P</i> 2 <sub>1</sub> / <i>c</i>                                                                                            | <i>P</i> 2 <sub>1</sub> / <i>c</i>                                                                                                            |
| <i>a</i> [Å]                                                                | 12.4596(1)                                                                                     | 12.8855(1)                                                                                                                    | 12.8880(2)                                                                                                                                    |
| <i>b</i> [Å]                                                                | 27.6079(2)                                                                                     | 43.5442(4)                                                                                                                    | 43.5784(5)                                                                                                                                    |
| <i>c</i> [Å]                                                                | 20.0624(2)                                                                                     | 14.9499(1)                                                                                                                    | 15.0001(2)                                                                                                                                    |
| <i>α</i> [°]                                                                | 90                                                                                             | 90                                                                                                                            | 90                                                                                                                                            |
| <i>β</i> [°]                                                                | 104.466(1)                                                                                     | 95.216(1)                                                                                                                     | 95.152(2)                                                                                                                                     |
| <i>γ</i> [°]                                                                | 90                                                                                             | 90                                                                                                                            | 90                                                                                                                                            |
| <i>V</i> [Å <sup>3</sup> ]                                                  | 6682.34(10)                                                                                    | 8353.49(12)                                                                                                                   | 8390.6(2)                                                                                                                                     |
| <i>Z</i>                                                                    | 4                                                                                              | 4                                                                                                                             | 4                                                                                                                                             |
| <i>ρ</i> <sub>calc</sub> [gcm <sup>-3</sup> ]                               | 1.522                                                                                          | 1.612                                                                                                                         | 1.674                                                                                                                                         |
| <i>μ</i> [mm <sup>-1</sup> ]                                                | 5.096                                                                                          | 6.923                                                                                                                         | 7.403                                                                                                                                         |
| diffractometer                                                              | Agilent SuperNova                                                                              | Agilent SuperNova                                                                                                             | Agilent SuperNova                                                                                                                             |
| radiation                                                                   | Cu–K <sub>α</sub>                                                                              | Cu–K <sub>α</sub>                                                                                                             | Cu–K <sub>α</sub>                                                                                                                             |
| <i>θ</i> range [°]                                                          | 3.20 – 70.07                                                                                   | 3.14 – 73.67                                                                                                                  | 3.13 – 66.59                                                                                                                                  |
| absorption correct.                                                         | analytical                                                                                     | analytical                                                                                                                    | analytical                                                                                                                                    |
| <i>T</i> <sub>min</sub> / <i>T</i> <sub>max</sub>                           | 0.548 / 0.832                                                                                  | 0.515 / 0.887                                                                                                                 | 0.262 / 0.791                                                                                                                                 |
| reflns collect / unique                                                     | 38396 / 12632                                                                                  | 60821 / 16362                                                                                                                 | 62003 / 14787                                                                                                                                 |
| reflns obs [ <i>I</i> > 2σ( <i>I</i> )]                                     | 10855                                                                                          | 15012                                                                                                                         | 12776                                                                                                                                         |
| <i>R</i> <sub>int</sub>                                                     | 0.0236                                                                                         | 0.0462                                                                                                                        | 0.0513                                                                                                                                        |
| parameters / restraints                                                     | 781 / 0                                                                                        | 1055 / 110                                                                                                                    | 1078 / 103                                                                                                                                    |
| GOF on <i>F</i> <sup>2</sup>                                                | 1.123                                                                                          | 1.065                                                                                                                         | 1.037                                                                                                                                         |
| <i>R</i> <sub>1</sub> / <i>wR</i> <sub>2</sub> [ <i>I</i> > 2σ( <i>I</i> )] | 0.0299 / 0.0869                                                                                | 0.0506 / 0.1293                                                                                                               | 0.0465 / 0.1178                                                                                                                               |
| <i>R</i> <sub>1</sub> / <i>wR</i> <sub>2</sub> (all data)                   | 0.0369 / 0.0950                                                                                | 0.0548 / 0.1315                                                                                                               | 0.0534 / 0.1214                                                                                                                               |
| max / min Δ <i>ρ</i> [eÅ <sup>-3</sup> ]                                    | 0.866 / -0.764                                                                                 | 1.732 / -1.124                                                                                                                | 0.784 / -1.024                                                                                                                                |

**Table 2. Crystallographic details for the compounds 4-6.**

|                                                                             | 4                                                                                                 | 5                                                                                                                | 6                                                                                                             |
|-----------------------------------------------------------------------------|---------------------------------------------------------------------------------------------------|------------------------------------------------------------------------------------------------------------------|---------------------------------------------------------------------------------------------------------------|
| Empirical formula                                                           | C <sub>74</sub> H <sub>73</sub> BCl <sub>2</sub> Cu <sub>3</sub> F <sub>4</sub> FeP <sub>11</sub> | C <sub>76</sub> H <sub>77</sub> As <sub>2</sub> BCl <sub>6</sub> Cu <sub>3</sub> F <sub>4</sub> FeP <sub>6</sub> | C <sub>68</sub> H <sub>64</sub> BCl <sub>2</sub> Cu <sub>3</sub> F <sub>4</sub> N <sub>2</sub> P <sub>6</sub> |
| <i>M</i> [gmol <sup>-1</sup> ]                                              | 1707.21                                                                                           | 2096.81                                                                                                          | 1443.39                                                                                                       |
| Crystal size [mm]                                                           | 0.43 × 0.17 × 0.11                                                                                | 0.13 × 0.11 × 0.06                                                                                               | 0.60 × 0.45 × 0.33                                                                                            |
| <i>T</i> [K]                                                                | 123(1)                                                                                            | 123(1)                                                                                                           | 150(1)                                                                                                        |
| <i>λ</i> [Å]                                                                | 0.71073                                                                                           | 1.54178                                                                                                          | 0.71073                                                                                                       |
| crystal system                                                              | monoclinic                                                                                        | monoclinic                                                                                                       | triclinic                                                                                                     |
| space group                                                                 | <i>P</i> 2 <sub>1</sub> / <i>c</i>                                                                | <i>P</i> 2 <sub>1</sub> / <i>c</i>                                                                               | <i>P</i> 1                                                                                                    |
| <i>a</i> [Å]                                                                | 12.5098(3)                                                                                        | 12.5858(1)                                                                                                       | 12.7414(4)                                                                                                    |
| <i>b</i> [Å]                                                                | 25.2944(6)                                                                                        | 24.4849(2)                                                                                                       | 13.4211(4)                                                                                                    |
| <i>c</i> [Å]                                                                | 27.8308(5)                                                                                        | 27.9362(2)                                                                                                       | 21.4040(7)                                                                                                    |
| <i>α</i> [°]                                                                | 90                                                                                                | 90                                                                                                               | 85.562(3)                                                                                                     |
| <i>β</i> [°]                                                                | 97.692(2)                                                                                         | 98.748(1)                                                                                                        | 72.949(3)                                                                                                     |
| <i>γ</i> [°]                                                                | 90                                                                                                | 90                                                                                                               | 79.079(3)                                                                                                     |
| <i>V</i> [Å <sup>3</sup> ]                                                  | 8727.2(3)                                                                                         | 8508.73(12)                                                                                                      | 3435.0(2)                                                                                                     |
| <i>Z</i>                                                                    | 4                                                                                                 | 4                                                                                                                | 2                                                                                                             |
| <i>ρ</i> <sub>calc</sub> [gcm <sup>-3</sup> ]                               | 1.299                                                                                             | 1.637                                                                                                            | 1.395                                                                                                         |
| <i>μ</i> [mm <sup>-1</sup> ]                                                | 1.443                                                                                             | 7.545                                                                                                            | 1.190                                                                                                         |
| diffractometer                                                              | Agilent Gemini R Ultra                                                                            | Agilent Gemini R Ultra                                                                                           | Bruker Apex II                                                                                                |
| radiation                                                                   | Mo–K <sub>α</sub>                                                                                 | Cu–K <sub>α</sub>                                                                                                | Mo–K <sub>α</sub>                                                                                             |
| <i>θ</i> range [°]                                                          | 3.04 – 27.10                                                                                      | 3.20 – 66.64                                                                                                     | 2.49 – 27.38                                                                                                  |
| absorption correct.                                                         | analytical                                                                                        | analytical                                                                                                       | multi-scan                                                                                                    |
| <i>T</i> <sub>min</sub> / <i>T</i> <sub>max</sub>                           | 0.705 / 0.878                                                                                     | 0.541 / 0.792                                                                                                    | 0.6342 / 0.7456                                                                                               |
| reflns collect / unique                                                     | 64795 / 19018                                                                                     | 61670 / 14620                                                                                                    | 24359 / 15299                                                                                                 |
| reflns obs [ <i>I</i> > 2σ( <i>I</i> )]                                     | 13117                                                                                             | 10588                                                                                                            | 10562                                                                                                         |
| <i>R</i> <sub>int</sub>                                                     | 0.0283                                                                                            | 0.0337                                                                                                           | 0.0418                                                                                                        |
| parameters / restraints                                                     | 890 / 48                                                                                          | 924 / 0                                                                                                          | 807 / 266                                                                                                     |
| GOF on <i>F</i> <sup>2</sup>                                                | 1.046                                                                                             | 0.960                                                                                                            | 1.026                                                                                                         |
| <i>R</i> <sub>1</sub> / <i>wR</i> <sub>2</sub> [ <i>I</i> > 2σ( <i>I</i> )] | 0.0384 / 0.1220                                                                                   | 0.0379 / 0.1016                                                                                                  | 0.0539 / 0.1417                                                                                               |
| <i>R</i> <sub>1</sub> / <i>wR</i> <sub>2</sub> (all data)                   | 0.0559 / 0.1272                                                                                   | 0.0549 / 0.1065                                                                                                  | 0.0831 / 0.1549                                                                                               |
| max / min Δ <i>ρ</i> [eÅ <sup>-3</sup> ]                                    | 0.930 / -0.541                                                                                    | 1.234 / -1.191                                                                                                   | 2.045 / -2.093                                                                                                |

### Structure refinement details:

compound 1: The asymmetric unit contains one cationic [Cu<sub>3</sub>] coordination unit, consisting of three Cu, two Cl atoms and two dpmp ligands as well as the [BF<sub>4</sub>]<sup>-</sup> anion and two CH<sub>2</sub>Cl<sub>2</sub> solvent molecules. The structure solution and refinement could be done without difficulty.

compound 2: The asymmetric unit contains one unit of the coordination compound **2** consisting of the cationic [Cu<sub>3</sub>] complex of two dpmp ligands, three Cu and two Cl atoms coordinated to a P atom of the Mo complex **A1**. It also contains a [BF<sub>4</sub>]<sup>-</sup> anion and two CH<sub>2</sub>Cl<sub>2</sub> molecules. The solvent molecules are disordered over two positions (50:50) or three positions (49:28:23). The anion is disordered over two positions (67:33) and the minor part is refined isotropically. During the refinement process the tetrahedral geometry of the anion was restrained by SADI commands and several DFIX commands and some EADP constraints were applied to the disordered solvent molecules.

compound 3: The asymmetric unit contains one [Cu<sub>3</sub>] coordination unit, consisting of three Cu, two Cl atoms and two dpmp ligands coordinated to one As<sub>2</sub> ligand complex **A2**, two disordered CH<sub>2</sub>Cl<sub>2</sub> solvent molecules and one [BF<sub>4</sub>]<sup>-</sup> anion. One phenyl ring of the dpmp ligand is disordered over two positions with a ratio of 61 % to 39 %. The two solvent molecules are disordered over two or three positions, respectively with the occupancies of 54:46 and 50:25:25. SADI restraints as well as EADP constraints were used for the refinement of the solvent molecules.

compound 4: With the aid of PLATON a solvent accessible area was found. The residual difference Fourier peaks exhibit a geometrical environment resembling the molecular geometry of CH<sub>2</sub>Cl<sub>2</sub> molecules. Unfortunately, the refinement of disordered (and restrained) CH<sub>2</sub>Cl<sub>2</sub> molecules did not lead to a satisfactory structure solution. Therefore we treated the residual electron density with the program SQUEEZE<sup>[iii]</sup> which showed a solvent accessible void. The midpoint, the size and the number of electrons in that void were refined and the contribution to the calculated structure factors of the disordered solvent is taken into account by back-Fourier transformation. The void is found around (0 0.5 0), the size is 779 Å<sup>3</sup>, and 172 e<sup>-</sup> were detected. This electron number corresponds roughly to four CH<sub>2</sub>Cl<sub>2</sub> molecules. These four CH<sub>2</sub>Cl<sub>2</sub> molecules are not taken into account for the empirical formula and the calculated density, but for the analytical absorption correction and the given absorption coefficient. The disordered [BF<sub>4</sub>]<sup>-</sup> anion was restrained with SADI commands to form a tetrahedron. Several disordered phenyl rings were fixed using the AFIX 66 command. Otherwise, the refinement was not stable or the resulting C-C bonds did not show physically correct lengths.

compound 5: The asymmetric unit contains one cationic [Cu<sub>3</sub>] coordination unit, consisting of three Cu, two Cl atoms and two dpmp ligands coordinated to one *cyclo*-As<sub>5</sub> sandwich complex **B2** as well as the [BF<sub>4</sub>]<sup>-</sup> anion and two CH<sub>2</sub>Cl<sub>2</sub> solvent molecules. The structure solution and refinement could be done without difficulty.



compound 6:

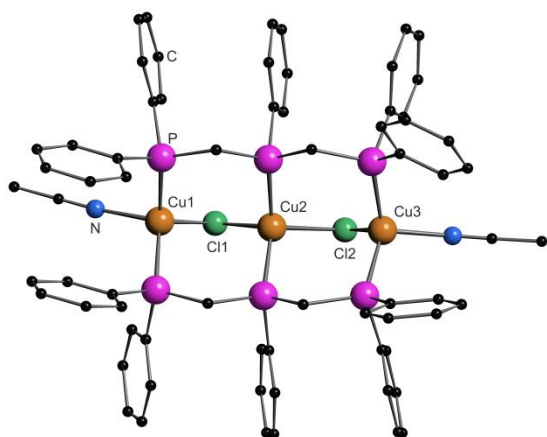

**Figure 1.** Crystal structure of compound 6. The  $\text{BF}_4^-$  anion, hydrogen atoms and solvent molecules are omitted for clarity. Selected bond lengths [ $\text{\AA}$ ] and angles [ $^\circ$ ]: Cu1-Cu2 3.230(6), Cu2-Cu3 3.3239(6), Cu1-Cl1 2.3333(11), Cu2-Cl1 2.4282(10), Cu2-Cl2 2.3862(10), Cu3-Cl2 2.3612(11), Cu1-N1 2.143(4), Cu3-N3 2.065(4), Cu1-Cu2-Cu3 164.73(2).

Figure 1 shows a representation of the cationic complex in compound 6 in the solid state. The geometry of the coordination compound is in good agreement with the formerly described complex  $[\text{Cu}_3(\mu\text{-Cl})_2(\text{dpmp})_2(\text{MeCN})_2]^+[\text{ClO}_4]^- \cdot \text{H}_2\text{O}$ .<sup>[i]</sup> The intramolecular Cu-Cu distances are distinctly elongated compared to the novel  $[\text{Cu}_3]$  coordination unit of compound 1 with vacant coordination sites on the external Cu cations.

structure solution: With the aid of PLATON a solvent accessible area was found, but it was impossible to refine any reasonable molecule from difference Fourier peaks. Therefore the midpoint, the size and the number of electrons in that void were refined and the contribution to the calculated structure factors of the disordered solvent is taken into account by back-Fourier transformation with the program SQUEEZE<sup>[iii]</sup> The void is found around (-0.192 0.052 0.173), the size is 133  $\text{\AA}^3$  and 45  $e^-$  were detected. The void most likely contains one THF molecule. The geometry of the disordered phenyl rings on the dpmp ligand was fixed to regular hexagons (AFIX 66). The displacement parameters of these carbon atoms were restrained by ISOR commands. Otherwise, the refinement was not stable or the resulting C-C bonds did not show physically correct lengths.

## Details on DFT calculations

All calculations were carried out using the TURBOMOLE program package.<sup>[iv]</sup> The geometries were optimized using the RI-<sup>[v]</sup>BP86<sup>[vi]</sup> functional together with the def2-SVP<sup>[vii]</sup> basis set. For the geometry optimizations the Multipole Accelerated Resolution of Identity (MARI-J)<sup>[viii]</sup> approximation was used. The final energy of the molecules has been determined by single point calculations without using the RI formalism. For the calculations of the relative energies of different transformations the SCF energies has been used.

**Table 3. Calculated relative energies at the BP86/def2-SVP level of theory.**

| Transformation                                                                                                                                                                                                                                                      | Rel. Energie<br>(kJ·mol <sup>-1</sup> ) |
|---------------------------------------------------------------------------------------------------------------------------------------------------------------------------------------------------------------------------------------------------------------------|-----------------------------------------|
| $[\text{Cu}_3(\mu\text{-Cl})_2(\text{dpmp})_2\{(\mu_3, \eta^1: \eta^2: \eta^2\text{-P}_2)\text{Mo}_2(\text{CO})_2\text{Cp}_2\}]^+ =$<br>$[\text{Cu}_3(\mu\text{-Cl})_2(\text{dpmp})_2]^+ + [(\mu, \eta^2: \eta^2\text{-P}_2)\text{Mo}_2(\text{CO})_2\text{Cp}_2]$   | 36.52                                   |
| $[\text{Cu}_3(\mu\text{-Cl})_2(\text{dpmp})_2\{(\mu_3, \eta^1: \eta^2: \eta^2\text{-As}_2)\text{Mo}_2(\text{CO})_2\text{Cp}_2\}]^+ =$<br>$[\text{Cu}_3(\mu\text{-Cl})_2(\text{dpmp})_2]^+ + [(\mu, \eta^2: \eta^2\text{-As}_2)\text{Mo}_2(\text{CO})_2\text{Cp}_2]$ | 31.67                                   |
| $[\text{Cu}_3(\mu\text{-Cl})_2(\text{dpmp})_2\{(\mu_3, \eta^1: \eta^5\text{-P}_5)\text{FeCp}^*\}]^+ =$<br>$[\text{Cu}_3(\mu\text{-Cl})_2(\text{dpmp})_2]^+ + [(\eta^5\text{-P}_5)\text{FeCp}^*]$                                                                    | 41.20                                   |
| $[\text{Cu}_3(\mu\text{-Cl})_2(\text{dpmp})_2\{(\mu_3, \eta^1: \eta^5\text{-As}_5)\text{FeCp}^*\}]^+ =$<br>$[\text{Cu}_3(\mu\text{-Cl})_2(\text{dpmp})_2]^+ + [(\eta^5\text{-As}_5)\text{FeCp}^*]$                                                                  | 31.87                                   |
| $[\text{Cu}_3(\mu\text{-Cl})_2(\text{dpmp})_2\{(\mu_3, \eta^1: \eta^5\text{-P}_5)\text{FeCp}^*\}]^+ =$<br>$[\text{Cu}_3(\mu\text{-Cl})_2(\text{dpmp})_2\{(\mu_3, \eta^2: \eta^5\text{-P}_5)\text{FeCp}^*\}]^+$                                                      | 22.86                                   |
| $[\text{Cu}_3(\mu\text{-Cl})_2(\text{dpmp})_2\{(\mu_3, \eta^1: \eta^5\text{-As}_5)\text{FeCp}^*\}]^+ =$<br>$[\text{Cu}_3(\mu\text{-Cl})_2(\text{dpmp})_2\{(\mu_3, \eta^2: \eta^5\text{-As}_5)\text{FeCp}^*\}]^+$                                                    | 16.98                                   |

**Table 4. Calculated geometric parameters and energies of the model compound**

$[\text{Cu}_3(\mu\text{-Cl})_2(\text{dmmp})_2\{(\mu_3, \eta^1: \eta^2: \eta^2\text{-P}_2)\text{Mo}_2(\text{CO})_2\text{Cp}_2\}]^+$  (dmmp = bis(dimethylphosphino) methylenephosphane) at the BP86/def2-SVP level of theory. The Cu3-P1 distance was fixed.

| Cu3-P1 (Å) | Cu3-Cu2 (Å) | Cu2-Cu1 (Å) | Tot. Energ.<br>(kJ·mol <sup>-1</sup> ) | Rel. Energ.<br>(kJ·mol <sup>-1</sup> ) |
|------------|-------------|-------------|----------------------------------------|----------------------------------------|
| 1,9260     | 3,7585      | 2,68482     | -26530936,61                           | 71,54                                  |
| 2,1126     | 3,6328      | 2,68962     | -26530992,28                           | 15,87                                  |
| 2,2653     | 3,5184      | 2,69746     | -26531006,18                           | 1,97                                   |
| 2,3752     | 3,4358      | 2,70449     | -26531008,15                           | 0,00                                   |
| 2,5650     | 3,2843      | 2,71716     | -26531005,25                           | 2,89                                   |
| 2,7150     | 3,1746      | 2,72719     | -26531001,31                           | 6,83                                   |
| 2,8650     | 3,0798      | 2,73596     | -26530997,46                           | 10,69                                  |
| 3,0150     | 3,0043      | 2,74162     | -26530994,17                           | 13,98                                  |
| 3,1650     | 2,9461      | 2,74471     | -26530991,53                           | 16,62                                  |
| 3,3150     | 2,9081      | 2,74984     | -26530989,55                           | 18,60                                  |
| 3,4650     | 2,8755      | 2,75065     | -26530988,11                           | 20,04                                  |
| 3,6150     | 2,8530      | 2,75154     | -26530987,02                           | 21,13                                  |

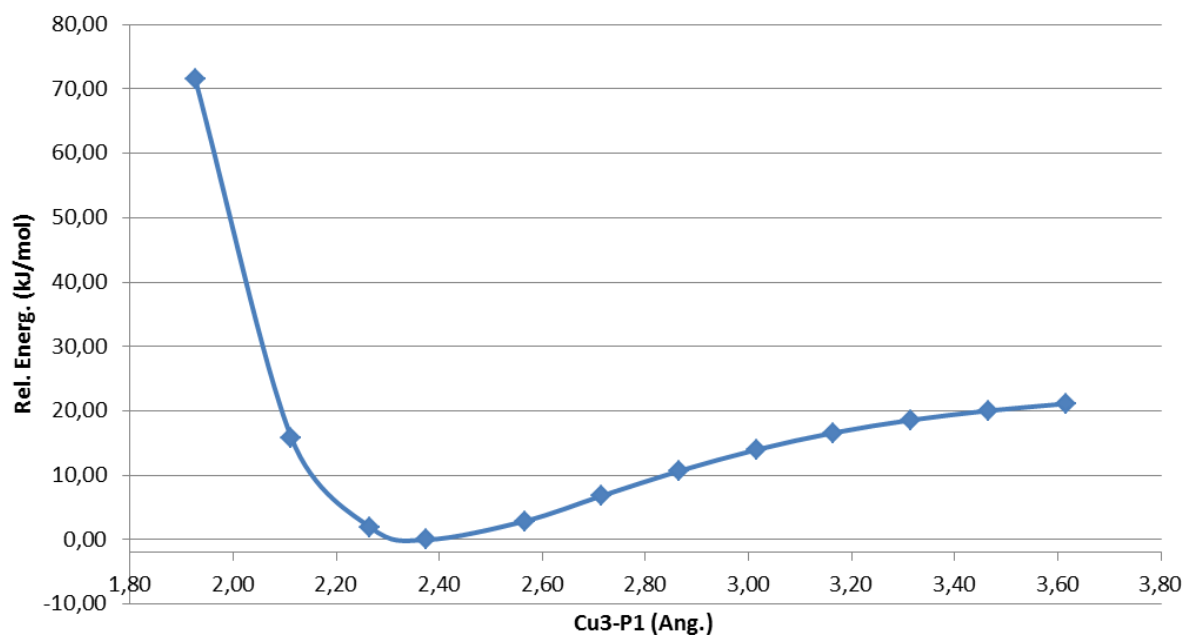

Figure 2. Variation of the relative energy of  $[\text{Cu}_3(\mu\text{-Cl})_2(\text{dmmp})_2\{(\mu_3, \eta^1: \eta^2: \eta^2\text{-P}_2) \text{Mo}_2(\text{CO})_2\text{Cp}_2\}]^+$  (dmmp = bis(dimethylphosphino) methylenephosphane) with the Cu3-P1 distance (restrained geometry optimization). Calculated at the BP86/def2-SVP level of theory.

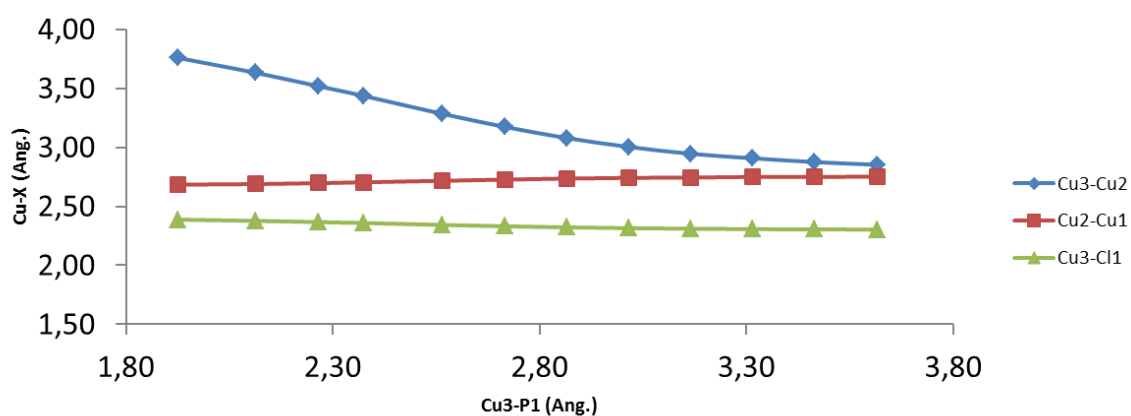

Figure 3. Variation of the Cu-X distances in  $[\text{Cu}_3(\mu\text{-Cl})_2(\text{dmmp})_2\{(\mu_3, \eta^1: \eta^2: \eta^2\text{-P}_2) \text{Mo}_2(\text{CO})_2\text{Cp}_2\}]^+$  (dmmp = bis(dimethylphosphino) methylenephosphane) with the Cu3-P1 distance (restrained geometry optimization). Calculated at the BP86/def2-SVP level of theory.

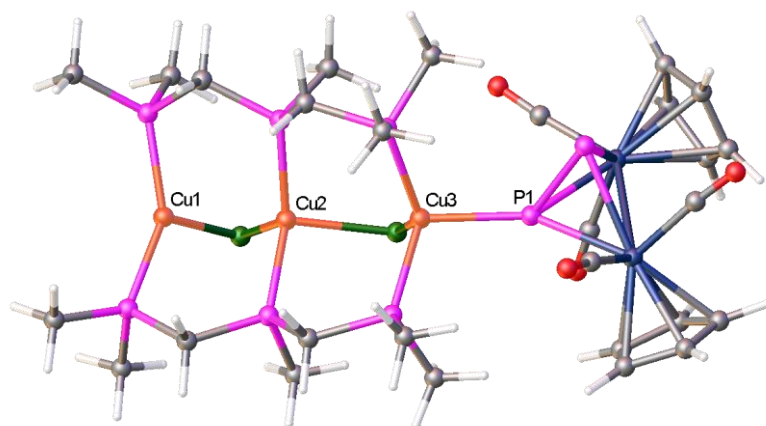

Figure 4. Geometry of the model compound  $[\text{Cu}_3(\mu\text{-Cl})_2(\text{dmmp})_2\{(\mu_3, \eta^1:\eta^2:\eta^2\text{-P}_2) \text{Mo}_2(\text{CO})_2\text{Cp}_2\}]^+$  (Cu3-P1 distance fixed at 2.4150 Å).

Table 5. Cartesian coordinates of the optimized geometry of  $[\text{Cu}_3(\mu\text{-Cl})_2(\text{dppm})_2]^+$  at the BP86/def2-SVP level of theory.

| Atom | x          | y          | z          |
|------|------------|------------|------------|
| Cu   | -2.1159590 | 8.0828575  | 32.9481763 |
| Cu   | -2.8609126 | 7.8239816  | 35.6457151 |
| Cu   | -2.8295845 | 8.0915136  | 38.4417028 |
| P    | -3.2553517 | 10.3004584 | 38.7037151 |
| P    | -0.9536586 | 6.9522296  | 39.0089463 |
| P    | -3.3705135 | 10.0765714 | 35.5763933 |
| P    | -0.8959975 | 6.6382898  | 35.9019749 |
| P    | -0.1534276 | 6.9497021  | 32.8840095 |
| P    | -2.4718886 | 10.2885158 | 32.5779938 |
| Cl   | -3.9308795 | 6.8602930  | 33.6461819 |
| Cl   | -4.4165747 | 6.8787333  | 37.3072967 |
| C    | 0.4638879  | 6.9643450  | 34.6481629 |
| C    | -0.1780500 | 5.1738200  | 32.3856416 |
| C    | 1.2735632  | 7.6160546  | 31.9138074 |
| C    | -2.5312963 | 11.1132842 | 34.2553020 |
| C    | -1.1853581 | 11.2628779 | 31.6838023 |
| C    | -4.0465044 | 10.7630411 | 31.7362458 |
| H    | 1.3295863  | 6.2824073  | 34.7858311 |
| H    | 0.8023188  | 8.0022592  | 34.8507877 |
| C    | 1.0146067  | 4.4373936  | 32.2035640 |
| C    | -1.4245846 | 4.5528398  | 32.1623272 |
| C    | 1.2937023  | 7.3590212  | 30.5222460 |
| C    | 2.2949398  | 8.4142762  | 32.4705949 |
| H    | -1.4726772 | 11.2176041 | 34.5752228 |
| H    | -2.9817856 | 12.1264590 | 34.2008316 |
| C    | -0.6030313 | 10.6615698 | 30.5461381 |
| C    | -0.7801609 | 12.5644409 | 32.0535676 |
| C    | -5.0870664 | 9.8102826  | 31.6860224 |
| C    | -4.2243667 | 12.0263123 | 31.1301146 |
| C    | 0.0976414  | 6.9586236  | 37.4634042 |
| C    | -1.0973383 | 4.8059806  | 35.8740058 |
| H    | 1.9937088  | 4.9176953  | 32.3573843 |
| C    | 0.9561629  | 3.0946962  | 31.8026322 |
| C    | -1.4749475 | 3.2073787  | 31.7587011 |

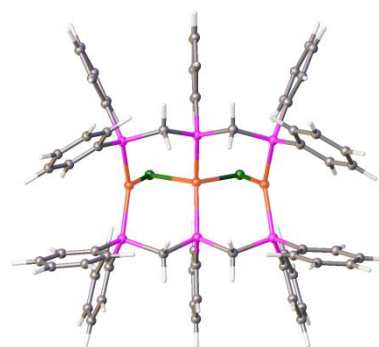

|   |            |            |            |
|---|------------|------------|------------|
| H | -2.3547324 | 5.1224510  | 32.3175008 |
| H | 0.5099105  | 6.7335632  | 30.0662394 |
| C | 2.3186669  | 7.8752429  | 29.7157825 |
| C | 3.3189440  | 8.9329879  | 31.6588920 |
| H | 2.3123292  | 8.6370675  | 33.5478126 |
| C | -2.8859094 | 11.1167839 | 37.0621593 |
| C | -5.1638144 | 10.4485985 | 35.3485210 |
| H | -0.8941390 | 9.6380596  | 30.2616059 |
| C | 0.3491102  | 11.3538298 | 29.7830079 |
| C | 0.1825724  | 13.2510375 | 31.2938019 |
| H | -1.2149679 | 13.0596508 | 32.9347658 |
| H | -4.9472861 | 8.8200815  | 32.1488653 |
| C | -6.2979184 | 10.1286393 | 31.0488779 |
| C | -5.4364843 | 12.3353142 | 30.4937013 |
| H | -3.4102617 | 12.7672029 | 31.1381569 |
| H | 0.4848354  | 7.9935066  | 37.3547737 |
| H | 0.9641914  | 6.2696956  | 37.5532680 |
| C | -2.3949601 | 4.2749497  | 35.7241942 |
| C | 0.0034870  | 3.9299861  | 35.9992439 |
| H | 1.8877817  | 2.5264861  | 31.6576949 |
| C | -0.2887302 | 2.4791891  | 31.5770532 |
| H | -2.4505155 | 2.7294721  | 31.5829388 |
| H | 2.3256118  | 7.6534171  | 28.6375763 |
| C | 3.3361947  | 8.6638350  | 30.2817153 |
| H | 4.1121782  | 9.5468739  | 32.1120615 |
| H | -3.3292328 | 12.1326263 | 36.9976452 |
| H | -1.7802516 | 11.2144746 | 37.0187151 |
| C | -5.6501457 | 11.7738918 | 35.2954045 |
| C | -6.0672031 | 9.3728529  | 35.2244528 |
| H | 0.7917898  | 10.8728604 | 28.8981800 |
| C | 0.7442282  | 12.6501080 | 30.1554965 |
| H | 0.4899222  | 14.2651877 | 31.5917139 |
| H | -7.1048152 | 9.3811534  | 31.0134022 |
| C | -6.4745847 | 11.3878795 | 30.4529304 |
| H | -5.5673477 | 13.3195209 | 30.0183597 |
| C | -1.1163989 | 5.1786031  | 39.4877903 |
| C | 0.1799019  | 7.6156957  | 40.3121640 |
| H | -3.2542912 | 4.9536874  | 35.6265911 |
| C | -2.5853002 | 2.8831828  | 35.7008644 |
| C | -0.1925771 | 2.5417821  | 35.9747580 |
| H | 1.0270262  | 4.3209523  | 36.1171068 |
| H | -0.3308819 | 1.4276731  | 31.2541815 |
| H | 4.1432042  | 9.0640649  | 29.6496454 |
| C | -2.2271703 | 11.2704118 | 39.8893675 |
| C | -4.9876703 | 10.7878416 | 39.1209893 |
| H | -4.9656037 | 12.6324508 | 35.3899695 |
| C | -7.0198286 | 12.0185086 | 35.1211504 |
| C | -7.4387375 | 9.6237258  | 35.0499924 |
| H | -5.6936436 | 8.3396599  | 35.2647305 |
| H | 1.4943708  | 13.1917360 | 29.5595759 |
| H | -7.4212619 | 11.6309901 | 29.9465844 |
| C | -2.3869562 | 4.5716522  | 39.4057543 |
| C | -0.0109117 | 4.4303229  | 39.9525962 |
| C | 1.2926325  | 8.4373472  | 40.0340669 |
| C | -0.1384991 | 7.3366668  | 41.6625711 |
| H | -3.6017057 | 2.4776702  | 35.5838889 |
| C | -1.4887475 | 2.0166479  | 35.8253874 |

|   |            |            |            |
|---|------------|------------|------------|
| H | 0.6704542  | 1.8659649  | 36.0726354 |
| C | -1.9438389 | 10.6652828 | 41.1336672 |
| C | -1.7417947 | 12.5720944 | 39.6342077 |
| C | -5.3033301 | 12.0522357 | 39.6654491 |
| C | -6.0145787 | 9.8436678  | 38.9036079 |
| H | -7.3895115 | 13.0543431 | 35.0811550 |
| C | -7.9166443 | 10.9421024 | 34.9983321 |
| H | -8.1357648 | 8.7774248  | 34.9541221 |
| H | -3.2454878 | 5.1498709  | 39.0286383 |
| C | -2.5484297 | 3.2288917  | 39.7888846 |
| C | -0.1793731 | 3.0903960  | 40.3308812 |
| H | 0.9820313  | 4.8993048  | 40.0371245 |
| H | 1.5694776  | 8.6794734  | 38.9972139 |
| C | 2.0771151  | 8.9557255  | 41.0789917 |
| C | 0.6477342  | 7.8537376  | 42.7028889 |
| H | -0.9995699 | 6.6936209  | 41.9039202 |
| H | -1.6404164 | 0.9265279  | 35.8063876 |
| H | -2.2962713 | 9.6412466  | 41.3343474 |
| C | -1.2088340 | 11.3542685 | 42.1099681 |
| C | -0.9955345 | 13.2552343 | 40.6098198 |
| H | -1.9452414 | 13.0698429 | 38.6741415 |
| H | -4.5079874 | 12.7863261 | 39.8661961 |
| C | -6.6347099 | 12.3711692 | 39.9745420 |
| C | -7.3448659 | 10.1720750 | 39.2134137 |
| H | -5.7698642 | 8.8522738  | 38.4894984 |
| H | -8.9915520 | 11.1360708 | 34.8618032 |
| H | -3.5428354 | 2.7618856  | 39.7252189 |
| C | -1.4490963 | 2.4893262  | 40.2523173 |
| H | 0.6835815  | 2.5128821  | 40.6962503 |
| H | 2.9469247  | 9.5874024  | 40.8426113 |
| C | 1.7599908  | 8.6643028  | 42.4147265 |
| H | 0.3929411  | 7.6145385  | 43.7467519 |
| H | -0.9984638 | 10.8702608 | 43.0752279 |
| C | -0.7328045 | 12.6507303 | 41.8499314 |
| H | -0.6230336 | 14.2695353 | 40.3996179 |
| H | -6.8738556 | 13.3562961 | 40.4035718 |
| C | -7.6568179 | 11.4325615 | 39.7482061 |
| H | -8.1403726 | 9.4314224  | 39.0411712 |
| H | -1.5796039 | 1.4398767  | 40.5578016 |
| H | 2.3803337  | 9.0644336  | 43.2308367 |
| H | -0.1523310 | 13.1897569 | 42.6139390 |
| H | -8.6990147 | 11.6834565 | 39.9983469 |

**Table 6. Cartesian coordinates of the optimized geometry of  $[\text{Cu}_3(\mu\text{-Cl})_2(\text{dppm})_2\{(\mu_3, \eta^1\text{-}\eta^2\text{-}\eta^2\text{-P}_2)\text{Mo}_2(\text{CO})_2\text{Cp}_2\}]^+$  at the BP86/def2-SVP level of theory.**

| Atom | x         | y          | z          |
|------|-----------|------------|------------|
| Mo   | 3.1585524 | 11.7612154 | 15.0617233 |
| Mo   | 5.0072623 | 13.1846595 | 13.0605651 |
| Cu   | 6.3211495 | 16.7366537 | 23.1566111 |
| Cu   | 5.7586566 | 15.7213896 | 20.6914785 |
| Cu   | 5.3623583 | 15.3264710 | 17.1990281 |
| Cl   | 4.9600813 | 14.0491086 | 19.1529827 |
| Cl   | 5.3979221 | 14.6437353 | 22.8797183 |
| P    | 4.6303173 | 13.8777016 | 15.4302444 |

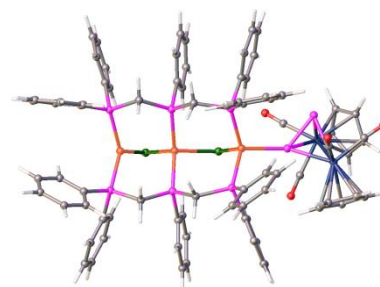

|   |            |            |            |
|---|------------|------------|------------|
| P | 2.8722294  | 14.1138027 | 14.2562104 |
| P | 4.8616997  | 18.4686090 | 23.3257551 |
| P | 4.2635974  | 17.4236455 | 20.4587132 |
| P | 4.0660366  | 17.2546977 | 17.2602183 |
| P | 7.6694242  | 15.6026189 | 17.0710147 |
| P | 7.9984581  | 15.7269484 | 20.2761302 |
| P | 8.5816684  | 16.9086251 | 23.1005727 |
| O | 2.7054079  | 12.8152695 | 10.9486733 |
| O | 5.0590364  | 16.1594745 | 12.0670062 |
| O | 2.0559974  | 12.4777738 | 17.9089958 |
| O | 5.7108420  | 10.5641239 | 16.4519486 |
| C | 6.3942710  | 11.2231644 | 13.1329413 |
| C | 6.1286014  | 11.5717720 | 11.7711378 |
| C | 6.7023381  | 12.8643092 | 11.5187301 |
| C | 7.3172787  | 13.3128926 | 12.7437757 |
| C | 7.1222635  | 12.3019163 | 13.7369328 |
| C | 3.5157168  | 12.9591603 | 11.7801496 |
| C | 4.9979705  | 15.0712123 | 12.4917514 |
| C | 1.3894593  | 11.1735266 | 13.5617004 |
| C | 2.5145973  | 10.3487432 | 13.2237486 |
| C | 2.8315806  | 9.5403354  | 14.3599471 |
| C | 1.8971884  | 9.8495994  | 15.4055035 |
| C | 1.0034850  | 10.8651525 | 14.9027090 |
| C | 2.5235828  | 12.2916980 | 16.8573150 |
| C | 4.7994310  | 11.0804932 | 15.9311928 |
| C | 4.5012601  | 18.9338124 | 21.5520590 |
| C | 4.2967830  | 18.3019642 | 18.8017552 |
| C | 8.5266340  | 16.3275060 | 18.5794015 |
| C | 9.0688528  | 16.8869275 | 21.2945965 |
| C | 5.3788871  | 20.0652317 | 24.1051975 |
| C | 5.3432559  | 20.1440719 | 25.5178042 |
| C | 5.7639936  | 21.3071062 | 26.1791914 |
| C | 6.2359316  | 22.4088375 | 25.4436071 |
| C | 6.2850582  | 22.3365056 | 24.0430122 |
| C | 5.8605959  | 21.1733988 | 23.3769735 |
| C | 3.2182694  | 18.1677695 | 24.1094014 |
| C | 2.8975925  | 16.8563436 | 24.5177573 |
| C | 1.6674852  | 16.5994841 | 25.1477824 |
| C | 0.7561761  | 17.6434474 | 25.3711895 |
| C | 1.0708887  | 18.9518220 | 24.9604453 |
| C | 2.2973828  | 19.2163544 | 24.3338753 |
| C | 2.5029863  | 16.9645719 | 20.7482458 |
| C | 2.2278060  | 15.6353495 | 21.1312909 |
| C | 0.9057183  | 15.2395240 | 21.3938526 |
| C | -0.1444555 | 16.1626230 | 21.2746060 |
| C | 0.1248766  | 17.4881272 | 20.8882918 |
| C | 1.4428206  | 17.8891142 | 20.6266062 |
| C | 2.2332203  | 17.0310102 | 17.1896355 |
| C | 1.7072576  | 15.7861458 | 17.5893319 |
| C | 0.3201081  | 15.5661951 | 17.5649318 |
| C | -0.5473981 | 16.5821386 | 17.1319549 |
| C | -0.0272598 | 17.8265474 | 16.7342113 |
| C | 1.3575369  | 18.0541380 | 16.7640712 |
| C | 4.3591539  | 18.5017710 | 15.9218379 |
| C | 5.0427304  | 19.7217831 | 16.1123991 |
| C | 5.2529861  | 20.5998169 | 15.0346001 |
| C | 4.7823202  | 20.2735180 | 13.7535541 |

|   |            |            |            |
|---|------------|------------|------------|
| C | 4.1070608  | 19.0569363 | 13.5514062 |
| C | 3.9022956  | 18.1756459 | 14.6229772 |
| C | 8.2727737  | 16.7474001 | 15.7482341 |
| C | 9.5032081  | 17.4421766 | 15.7937251 |
| C | 9.8889951  | 18.2766290 | 14.7312236 |
| C | 9.0550964  | 18.4257861 | 13.6100328 |
| C | 7.8264892  | 17.7466755 | 13.5585825 |
| C | 7.4358561  | 16.9199379 | 14.6243916 |
| C | 8.6232282  | 14.0396825 | 16.7890809 |
| C | 9.8221103  | 13.9887736 | 16.0446345 |
| C | 10.5020246 | 12.7696365 | 15.8843637 |
| C | 9.9939504  | 11.5952763 | 16.4659475 |
| C | 8.7969722  | 11.6396768 | 17.2006781 |
| C | 8.1062608  | 12.8532197 | 17.3554923 |
| C | 8.8385762  | 14.0965336 | 20.4823893 |
| C | 10.2174746 | 13.9159046 | 20.2379441 |
| C | 10.8109286 | 12.6596316 | 20.4289229 |
| C | 10.0326699 | 11.5731920 | 20.8675717 |
| C | 8.6614542  | 11.7470848 | 21.1117870 |
| C | 8.0621442  | 13.0033722 | 20.9201366 |
| C | 9.5568733  | 15.5565226 | 23.8977074 |
| C | 10.9259663 | 15.7003206 | 24.2134005 |
| C | 11.6174630 | 14.6496202 | 24.8356506 |
| C | 10.9488722 | 13.4535869 | 25.1516546 |
| C | 9.5862764  | 13.3099949 | 24.8441878 |
| C | 8.8863542  | 14.3576063 | 24.2224488 |
| C | 9.3847495  | 18.4458630 | 23.7324722 |
| C | 10.4405162 | 19.1155284 | 23.0755255 |
| C | 11.0168127 | 20.2642809 | 23.6450359 |
| C | 10.5514211 | 20.7514775 | 24.8770932 |
| C | 9.4988564  | 20.0927966 | 25.5357747 |
| C | 8.9141078  | 18.9530608 | 24.9640435 |
| H | 6.1260196  | 10.2805011 | 13.6208509 |
| H | 5.6150519  | 10.9448353 | 11.0319805 |
| H | 6.7149805  | 13.3873454 | 10.5551810 |
| H | 7.8675902  | 14.2508461 | 12.8838522 |
| H | 7.4915959  | 12.3306390 | 14.7683859 |
| H | 0.8951032  | 11.8874394 | 12.8934867 |
| H | 3.0122024  | 10.3123003 | 12.2495382 |
| H | 3.6224288  | 8.7821669  | 14.4115236 |
| H | 1.8403288  | 9.3628717  | 16.3862037 |
| H | 0.1525623  | 11.2981993 | 15.4419121 |
| H | 5.4181095  | 19.4317418 | 21.1722665 |
| H | 3.6554661  | 19.6491948 | 21.4714230 |
| H | 3.5789825  | 19.1503139 | 18.7812472 |
| H | 5.3232565  | 18.7216376 | 18.7406340 |
| H | 9.6272190  | 16.2257583 | 18.4691560 |
| H | 8.2823765  | 17.4112009 | 18.5624057 |
| H | 10.1492543 | 16.6724183 | 21.1550569 |
| H | 8.8621589  | 17.9108395 | 20.9166030 |
| H | 4.9658686  | 19.2931267 | 26.1068423 |
| H | 5.7163056  | 21.3549099 | 27.2779643 |
| H | 6.5608681  | 23.3233401 | 25.9623991 |
| H | 6.6500780  | 23.1942675 | 23.4577352 |
| H | 5.9036609  | 21.1492954 | 22.2779795 |
| H | 3.6091630  | 16.0361881 | 24.3299347 |
| H | 1.4246946  | 15.5746484 | 25.4670418 |



|   |            |            |            |
|---|------------|------------|------------|
| H | -0.2036864 | 17.4406077 | 25.8705100 |
| H | 0.3586524  | 19.7725493 | 25.1363194 |
| H | 2.5450789  | 20.2469433 | 24.0346685 |
| H | 3.0535073  | 14.9143159 | 21.2229079 |
| H | 0.7003568  | 14.2006594 | 21.6934208 |
| H | -1.1798779 | 15.8516810 | 21.4823667 |
| H | -0.6968142 | 18.2136295 | 20.7907010 |
| H | 1.6339796  | 18.9311008 | 20.3238508 |
| H | 2.3887096  | 14.9942980 | 17.9337395 |
| H | -0.0768620 | 14.5914545 | 17.8846341 |
| H | -1.6336645 | 16.4057156 | 17.1022786 |
| H | -0.7040160 | 18.6249097 | 16.3926417 |
| H | 1.7561081  | 19.0272800 | 16.4383866 |
| H | 5.4160611  | 20.0108056 | 17.1055474 |
| H | 5.7837378  | 21.5492178 | 15.2038792 |
| H | 4.9399013  | 20.9659650 | 12.9127671 |
| H | 3.7389894  | 18.7860995 | 12.5508207 |
| H | 3.3688567  | 17.2270445 | 14.4506649 |
| H | 10.1764499 | 17.3384318 | 16.6580442 |
| H | 10.8497556 | 18.8119110 | 14.7800662 |
| H | 9.3605933  | 19.0799016 | 12.7791628 |
| H | 7.1549451  | 17.8663660 | 12.6959430 |
| H | 6.4600316  | 16.4112404 | 14.5977985 |
| H | 10.2248473 | 14.8997197 | 15.5766593 |
| H | 11.4328320 | 12.7381290 | 15.2972442 |
| H | 10.5286610 | 10.6415633 | 16.3382068 |
| H | 8.3831939  | 10.7235981 | 17.6459831 |
| H | 7.1589690  | 12.8829651 | 17.9176049 |
| H | 10.8452227 | 14.7540057 | 19.8941412 |
| H | 11.8863680 | 12.5275329 | 20.2359347 |
| H | 10.5011474 | 10.5886943 | 21.0199249 |
| H | 8.0478963  | 10.9007852 | 21.4563437 |
| H | 6.9879507  | 13.1429373 | 21.1122271 |
| H | 11.4522711 | 16.6411990 | 23.9901493 |
| H | 12.6831950 | 14.7693899 | 25.0840781 |
| H | 11.4922101 | 12.6344589 | 25.6472513 |
| H | 9.0571270  | 12.3783232 | 25.0955839 |
| H | 7.8156683  | 14.2468665 | 23.9851592 |
| H | 10.8291942 | 18.7452508 | 22.1149820 |
| H | 11.8393288 | 20.7770205 | 23.1231263 |
| H | 11.0071001 | 21.6484794 | 25.3231558 |
| H | 9.1223814  | 20.4739830 | 26.4966026 |
| H | 8.0762309  | 18.4528821 | 25.4749273 |

**Table 7. Cartesian coordinates of the optimized geometry of  $[\text{Cu}_3(\mu\text{-Cl})_2(\text{dppm})_2\{(\mu_3, \eta^1\text{-}\eta^2\text{-}\eta^2\text{-As}_2) \text{Mo}_2(\text{CO})_2\text{Cp}_2\}]^+$  at the BP86/def2-SVP level of theory.**

| Atom | x          | y         | z          |
|------|------------|-----------|------------|
| Cu   | 11.2121151 | 6.3276361 | 12.5625427 |
| Cu   | 10.8345364 | 6.0068547 | 9.1790979  |
| Cu   | 10.2635433 | 5.0269715 | 6.6898561  |
| Cl   | 11.1923836 | 7.1102753 | 6.9989365  |
| Cl   | 11.6615229 | 7.6913814 | 10.6960646 |
| P    | 12.3376335 | 4.3027605 | 9.3752623  |
| P    | 8.5900171  | 6.0093069 | 9.5889550  |
| P    | 11.7213871 | 3.2969870 | 6.4961381  |

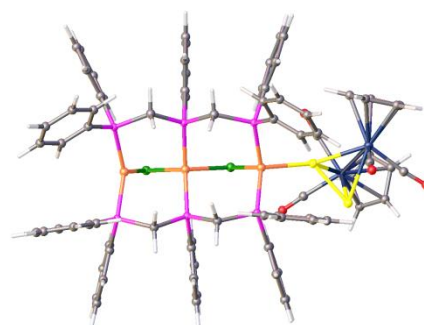

|    |            |            |            |
|----|------------|------------|------------|
| P  | 8.0026664  | 4.8690244  | 6.7454184  |
| P  | 12.5462711 | 4.4447266  | 12.5618501 |
| P  | 8.9232767  | 6.0956614  | 12.7812701 |
| Mo | 11.6269015 | 8.6390477  | 16.9162425 |
| Mo | 13.4717269 | 10.0922691 | 14.8718742 |
| As | 11.9254997 | 7.9065373  | 14.4346899 |
| As | 13.8751967 | 7.6565642  | 15.7289647 |
| C  | 9.5015506  | 9.5124102  | 16.2593714 |
| H  | 9.1002464  | 9.4581579  | 15.2408870 |
| C  | 10.2502300 | 10.6042591 | 16.8119701 |
| C  | 9.3277649  | 8.5325688  | 17.2885577 |
| H  | 10.5108342 | 11.5295969 | 16.2882805 |
| C  | 10.5481207 | 10.2948389 | 18.1772177 |
| C  | 9.9728831  | 9.0141771  | 18.4841642 |
| H  | 8.7683684  | 7.5946102  | 17.1911488 |
| C  | 13.1270599 | 8.8568536  | 18.1865174 |
| C  | 11.6108515 | 6.7443491  | 17.4511749 |
| H  | 11.0810603 | 10.9413463 | 18.8850210 |
| H  | 9.9811953  | 8.5199719  | 19.4627430 |
| O  | 13.9322738 | 9.0143535  | 19.0225941 |
| O  | 11.5206206 | 5.6469517  | 17.8507361 |
| C  | 13.6945189 | 12.3192280 | 15.5817709 |
| C  | 14.6489674 | 12.0541330 | 14.5413529 |
| C  | 15.5809976 | 11.0773689 | 15.0481668 |
| C  | 15.2008920 | 10.7494640 | 16.3875277 |
| C  | 14.0387944 | 11.5234351 | 16.7192830 |
| C  | 11.8358336 | 10.7230754 | 13.9592075 |
| C  | 14.1622290 | 9.5247151  | 13.1108189 |
| C  | 12.3284186 | 3.3996298  | 11.0191608 |
| C  | 14.3733791 | 4.7008184  | 12.6449356 |
| C  | 12.2593838 | 3.2027231  | 13.9051629 |
| C  | 8.0478805  | 5.3927169  | 11.2758317 |
| C  | 8.3363740  | 4.9475690  | 14.1072255 |
| C  | 7.9919540  | 7.6643192  | 13.1001193 |
| H  | 12.8726687 | 13.0433789 | 15.5261506 |
| H  | 14.6910341 | 12.5439869 | 13.5615437 |
| H  | 16.4537963 | 10.6834432 | 14.5137877 |
| H  | 15.7251686 | 10.0621423 | 17.0608025 |
| H  | 13.5348328 | 11.5356883 | 17.6906591 |
| O  | 10.9282909 | 11.2286991 | 13.4176219 |
| O  | 14.6617293 | 9.3126655  | 12.0771920 |
| H  | 11.3096402 | 2.9621466  | 11.0838201 |
| H  | 13.0614604 | 2.5643028  | 11.0261471 |
| C  | 15.2605257 | 3.6885851  | 13.0729107 |
| C  | 14.8828793 | 5.9572056  | 12.2587187 |
| C  | 11.6269457 | 1.9560935  | 13.7113362 |
| C  | 12.6682375 | 3.5608520  | 15.2115739 |
| H  | 8.2801240  | 4.3062765  | 11.2815585 |
| H  | 6.9487703  | 5.5075042  | 11.3876299 |
| C  | 7.1217752  | 4.2263158  | 14.0556276 |
| C  | 9.1629602  | 4.8076325  | 15.2433199 |
| C  | 6.7935820  | 7.7091036  | 13.8458393 |
| C  | 8.5222470  | 8.8583065  | 12.5631527 |
| C  | 12.0935110 | 2.8089552  | 8.2612950  |
| C  | 14.0951412 | 4.7708876  | 9.0809468  |
| H  | 14.8733000 | 2.7080481  | 13.3902659 |
| C  | 16.6414099 | 3.9365992  | 13.1155203 |

|   |            |            |            |
|---|------------|------------|------------|
| C | 16.2665810 | 6.1974085  | 12.2967443 |
| H | 14.1932654 | 6.7436853  | 11.9165844 |
| H | 11.2936735 | 1.6410718  | 12.7118542 |
| C | 11.4182998 | 1.0844303  | 14.7948138 |
| C | 12.4643973 | 2.6868264  | 16.2890247 |
| H | 13.1614438 | 4.5306313  | 15.3862046 |
| C | 7.5163352  | 4.8694157  | 8.5516955  |
| C | 7.7624100  | 7.6485453  | 9.4037340  |
| H | 6.4565032  | 4.3059085  | 13.1827043 |
| C | 6.7415060  | 3.3962523  | 15.1237165 |
| C | 8.7768303  | 3.9865803  | 16.3147454 |
| H | 10.1273929 | 5.3371925  | 15.2789370 |
| H | 6.3817190  | 6.7907593  | 14.2910614 |
| C | 6.1262787  | 8.9308149  | 14.0352760 |
| C | 7.8447667  | 10.0752487 | 12.7483647 |
| H | 9.4677633  | 8.8322326  | 11.9977911 |
| H | 12.9411353 | 2.0941518  | 8.3259543  |
| H | 11.1804294 | 2.3040978  | 8.6408912  |
| C | 15.1583266 | 3.8490292  | 9.1974519  |
| C | 14.3661637 | 6.1031960  | 8.7060066  |
| H | 17.3273165 | 3.1465568  | 13.4581599 |
| C | 17.1456615 | 5.1912199  | 12.7293814 |
| H | 16.6503921 | 7.1811736  | 11.9891455 |
| H | 10.9279589 | 0.1138862  | 14.6235568 |
| C | 11.8393238 | 1.4440489  | 16.0841168 |
| H | 12.7928788 | 2.9843075  | 17.2958245 |
| H | 7.7168412  | 3.8393044  | 8.9159492  |
| H | 6.4372069  | 5.0884311  | 8.6939218  |
| C | 6.3845191  | 7.8346300  | 9.6503333  |
| C | 8.5466070  | 8.7432735  | 8.9842633  |
| H | 5.7933104  | 2.8394943  | 15.0699076 |
| C | 7.5642376  | 3.2795692  | 16.2567398 |
| H | 9.4393651  | 3.8943785  | 17.1876950 |
| H | 5.1951918  | 8.9578060  | 14.6221637 |
| C | 6.6475793  | 10.1137381 | 13.4830538 |
| H | 8.2692528  | 10.9974827 | 12.3266389 |
| C | 11.1976824 | 1.7104310  | 5.7004101  |
| C | 13.3601358 | 3.6080698  | 5.7072598  |
| C | 7.0347692  | 6.2376600  | 5.9679408  |
| C | 7.1916557  | 3.3444239  | 6.0938267  |
| H | 14.9705491 | 2.8044435  | 9.4933382  |
| C | 16.4752120 | 4.2559942  | 8.9397252  |
| C | 15.6872267 | 6.5048928  | 8.4470818  |
| H | 13.5385261 | 6.8223432  | 8.6179617  |
| H | 18.2288474 | 5.3839032  | 12.7691142 |
| H | 11.6820101 | 0.7570978  | 16.9294338 |
| H | 5.7506238  | 6.9954955  | 9.9800492  |
| C | 5.7998679  | 9.0978809  | 9.4795601  |
| C | 7.9560006  | 10.0066408 | 8.8130099  |
| H | 9.6200413  | 8.6000880  | 8.7910403  |
| H | 7.2625656  | 2.6296413  | 17.0922580 |
| H | 6.1228643  | 11.0696175 | 13.6339659 |
| C | 10.6938453 | 0.6048002  | 6.4175669  |
| C | 11.2461560 | 1.6389118  | 4.2878285  |
| C | 14.2838722 | 2.5639837  | 5.4735503  |
| C | 13.6749028 | 4.9229118  | 5.3053912  |
| C | 5.6651842  | 6.1052688  | 5.6493684  |

|   |            |            |           |
|---|------------|------------|-----------|
| C | 7.7110712  | 7.4384024  | 5.6624423 |
| C | 6.1263170  | 2.6770642  | 6.7375980 |
| C | 7.6661146  | 2.8454916  | 4.8603700 |
| H | 17.2992308 | 3.5326933  | 9.0340186 |
| C | 16.7405054 | 5.5848767  | 8.5623337 |
| H | 15.8893746 | 7.5463469  | 8.1544436 |
| H | 4.7252415  | 9.2341629  | 9.6741497 |
| C | 6.5859368  | 10.1860087 | 9.0593761 |
| H | 8.5758094  | 10.8542926 | 8.4833624 |
| H | 10.6393311 | 0.6236327  | 7.5161965 |
| C | 10.2610359 | -0.5489945 | 5.7410165 |
| C | 10.8163408 | 0.4851869  | 3.6158527 |
| H | 11.6404659 | 2.4878539  | 3.7071632 |
| H | 14.0408645 | 1.5307698  | 5.7675671 |
| C | 15.5071902 | 2.8364019  | 4.8441889 |
| C | 14.9016386 | 5.1876442  | 4.6720545 |
| H | 12.9617138 | 5.7396338  | 5.5015528 |
| H | 5.1342658  | 5.1634831  | 5.8572716 |
| C | 4.9788922  | 7.1690304  | 5.0437414 |
| C | 7.0162734  | 8.4991195  | 5.0574112 |
| H | 8.7822288  | 7.5403039  | 5.9014437 |
| H | 5.7346533  | 3.0410166  | 7.6993712 |
| C | 5.5444329  | 1.5386628  | 6.1532430 |
| C | 7.0757377  | 1.7162279  | 4.2737478 |
| H | 8.5114106  | 3.3437076  | 4.3598729 |
| H | 17.7751648 | 5.9008761  | 8.3585411 |
| H | 6.1244230  | 11.1761524 | 8.9233056 |
| H | 9.8789034  | -1.4049984 | 6.3178613 |
| C | 10.3228801 | -0.6142598 | 4.3405107 |
| H | 10.8742186 | 0.4428731  | 2.5173488 |
| H | 16.2218823 | 2.0193085  | 4.6615307 |
| C | 15.8157430 | 4.1481629  | 4.4395298 |
| H | 15.1396967 | 6.2151014  | 4.3577180 |
| H | 3.9127742  | 7.0581271  | 4.7928953 |
| C | 5.6531146  | 8.3669103  | 4.7473581 |
| H | 7.5499082  | 9.4321967  | 4.8212069 |
| H | 4.7144836  | 1.0275329  | 6.6648490 |
| C | 6.0137048  | 1.0598218  | 4.9193375 |
| H | 7.4552657  | 1.3414043  | 3.3116276 |
| H | 9.9909805  | -1.5214964 | 3.8134412 |
| H | 16.7731215 | 4.3571548  | 3.9379961 |
| H | 5.1137269  | 9.1965089  | 4.2650501 |
| H | 5.5536278  | 0.1709402  | 4.4616840 |

**Table 8.** Cartesian coordinates of the optimized geometry of  $[\text{Cu}_3(\mu\text{-Cl})_2(\text{dpmp})_2\{(\mu_3, \eta^1\text{-}\eta^5\text{-P}_5)\text{FeCp}^*\}]^+$  at the BP86/def2-SVP level of theory.

| Atom | x          | y          | z          |
|------|------------|------------|------------|
| Cu   | -2.3685675 | 7.8098217  | 32.2669085 |
| Cu   | -3.0471145 | 7.6804229  | 35.7086250 |
| Cu   | -2.9389543 | 8.0115905  | 38.4135530 |
| P    | -3.2878347 | 10.2405673 | 38.6365186 |
| P    | -1.0316529 | 6.9101278  | 38.9636524 |
| P    | -3.4227031 | 9.9227877  | 35.5347410 |
| P    | -1.0458085 | 6.6018133  | 35.8689501 |
| P    | -0.2855523 | 6.9261989  | 32.7807367 |

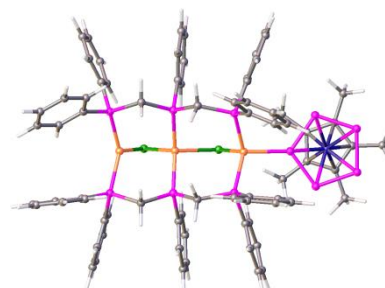

|    |            |            |            |
|----|------------|------------|------------|
| P  | -2.5418764 | 10.1180468 | 32.4480970 |
| Cl | -4.0043039 | 6.7973566  | 33.6710189 |
| Cl | -4.5898962 | 6.7655443  | 37.3978594 |
| Fe | -4.2221231 | 6.1726661  | 28.4167894 |
| P  | -2.4090790 | 5.9580609  | 26.8604618 |
| P  | -1.9660774 | 5.6166433  | 28.9382713 |
| P  | -2.8483163 | 7.2511382  | 30.0361958 |
| P  | -3.9306122 | 8.5283320  | 28.6778499 |
| P  | -3.6140929 | 7.7360440  | 26.7031813 |
| C  | -4.9842400 | 4.2255406  | 28.2284168 |
| C  | -5.6555553 | 5.1117639  | 27.3030940 |
| C  | -5.2085424 | 4.7233123  | 29.5670970 |
| C  | -4.2677608 | 2.9586982  | 27.8699256 |
| C  | -6.2935759 | 6.1579240  | 28.0715205 |
| C  | -5.7613296 | 4.9197519  | 25.8202710 |
| C  | -6.0181978 | 5.9172009  | 29.4701099 |
| C  | -4.7805669 | 4.0539890  | 30.8373455 |
| H  | -4.9786748 | 2.1039730  | 27.8655115 |
| H  | -3.4637469 | 2.7232491  | 28.5937974 |
| H  | -3.8069703 | 3.0165113  | 26.8649378 |
| C  | -7.1688046 | 7.2438261  | 27.5221800 |
| H  | -6.6514230 | 4.2991395  | 25.5784490 |
| H  | -4.8720249 | 4.4063283  | 25.4065259 |
| H  | -5.8696444 | 5.8836532  | 25.2865623 |
| C  | -6.5731942 | 6.6973317  | 30.6219350 |
| H  | -4.6659371 | 4.7761363  | 31.6690882 |
| H  | -3.8188759 | 3.5207249  | 30.7103106 |
| H  | -5.5414975 | 3.3039720  | 31.1457744 |
| H  | -6.8674539 | 7.5367657  | 26.4979443 |
| H  | -7.1386459 | 8.1531259  | 28.1531856 |
| H  | -8.2248797 | 6.8993886  | 27.4766298 |
| H  | -7.5699706 | 6.2946895  | 30.9066537 |
| H  | -6.7055579 | 7.7649525  | 30.3619626 |
| H  | -5.9208301 | 6.6410187  | 31.5150074 |
| C  | 0.2292512  | 7.0781220  | 34.5788165 |
| C  | -0.0431245 | 5.1265326  | 32.4374904 |
| C  | 1.1539021  | 7.6941559  | 31.9035776 |
| C  | -2.4754413 | 10.8204585 | 34.1885695 |
| C  | -1.2143019 | 11.0981772 | 31.6079265 |
| C  | -4.1013240 | 10.8511263 | 31.7755845 |
| H  | 1.1891367  | 6.5419409  | 34.7410799 |
| H  | 0.4067172  | 8.1597077  | 34.7586698 |
| C  | 1.2349566  | 4.5611837  | 32.2350070 |
| C  | -1.1854698 | 4.3012779  | 32.3902535 |
| C  | 1.2358046  | 7.4935068  | 30.5050526 |
| C  | 2.1385987  | 8.4853225  | 32.5322900 |
| H  | -1.4100997 | 10.7528197 | 34.4965703 |
| H  | -2.7587543 | 11.8943675 | 34.1718600 |
| C  | -0.7791062 | 10.6391176 | 30.3441843 |
| C  | -0.6422030 | 12.2767374 | 32.1369851 |
| C  | -5.2845479 | 10.0896419 | 31.8852973 |
| C  | -4.1462368 | 12.1241769 | 31.1682090 |
| C  | -0.0097339 | 6.9442711  | 37.3987557 |
| C  | -1.1344660 | 4.7616462  | 35.8240893 |
| H  | 2.1324821  | 5.1986450  | 32.2529903 |
| C  | 1.3651140  | 3.1853993  | 31.9892487 |
| C  | -1.0475937 | 2.9229611  | 32.1575047 |

|   |            |            |            |
|---|------------|------------|------------|
| H | -2.1806333 | 4.7464696  | 32.5450900 |
| H | 0.4746137  | 6.8852695  | 29.9909305 |
| C | 2.2853583  | 8.0534134  | 29.7632147 |
| C | 3.1842341  | 9.0542818  | 31.7834286 |
| H | 2.1113279  | 8.6647999  | 33.6168470 |
| C | -2.8828273 | 10.9999315 | 36.9759971 |
| C | -5.1851929 | 10.4122227 | 35.2924441 |
| H | -1.2058531 | 9.7164391  | 29.9212540 |
| C | 0.1893346  | 11.3512287 | 29.6207398 |
| C | 0.3373598  | 12.9806246 | 31.4155122 |
| H | -0.9583138 | 12.6671941 | 33.1153351 |
| H | -5.2459723 | 9.0877030  | 32.3406734 |
| C | -6.5020227 | 10.6120438 | 31.4205267 |
| C | -5.3644336 | 12.6329268 | 30.6888235 |
| H | -3.2264559 | 12.7179762 | 31.0560942 |
| H | 0.3464023  | 7.9899554  | 37.2868162 |
| H | 0.8765503  | 6.2778270  | 37.4635131 |
| C | -2.4135302 | 4.1683109  | 35.7877988 |
| C | 0.0142557  | 3.9412797  | 35.8520336 |
| H | 2.3634196  | 2.7526818  | 31.8217859 |
| C | 0.2243042  | 2.3646173  | 31.9513159 |
| H | -1.9416195 | 2.2818350  | 32.1341019 |
| H | 2.3377065  | 7.8747105  | 28.6783708 |
| C | 3.2642153  | 8.8368970  | 30.3998104 |
| H | 3.9451820  | 9.6659083  | 32.2918855 |
| H | -3.2816723 | 12.0316569 | 36.8788900 |
| H | -1.7738896 | 11.0466342 | 36.9314721 |
| C | -5.5850678 | 11.7563790 | 35.1280650 |
| C | -6.1601903 | 9.3929595  | 35.2972502 |
| H | 0.5102027  | 10.9818378 | 28.6353320 |
| C | 0.7517923  | 12.5228950 | 30.1545602 |
| H | 0.7731640  | 13.8973475 | 31.8416665 |
| H | -7.4239501 | 10.0208371 | 31.5274083 |
| C | -6.5440696 | 11.8807968 | 30.8184179 |
| H | -5.3896284 | 13.6226004 | 30.2073651 |
| C | -1.1500438 | 5.1340262  | 39.4485360 |
| C | 0.1095667  | 7.5925348  | 40.2505832 |
| H | -3.3082668 | 4.8084073  | 35.7681759 |
| C | -2.5385490 | 2.7689436  | 35.7836473 |
| C | -0.1163531 | 2.5451529  | 35.8449450 |
| H | 1.0233797  | 4.3829193  | 35.8763509 |
| H | 0.3287786  | 1.2862353  | 31.7564977 |
| H | 4.0883219  | 9.2757918  | 29.8172790 |
| C | -2.2324875 | 11.2035141 | 39.8051316 |
| C | -5.0006666 | 10.8019118 | 39.0426601 |
| H | -4.8419675 | 12.5700820 | 35.1177838 |
| C | -6.9412604 | 12.0761292 | 34.9699773 |
| C | -7.5181188 | 9.7186947  | 35.1410941 |
| H | -5.8496355 | 8.3455574  | 35.4282328 |
| H | 1.5147886  | 13.0785349 | 29.5885195 |
| H | -7.4976526 | 12.2831232 | 30.4434545 |
| C | -2.4157540 | 4.5122448  | 39.4199419 |
| C | -0.0192095 | 4.4016107  | 39.8757910 |
| C | 1.2139985  | 8.4197617  | 39.9565783 |
| C | -0.1923692 | 7.3183228  | 41.6057165 |
| H | -3.5403462 | 2.3136431  | 35.7608766 |
| C | -1.3938981 | 1.9574666  | 35.8125844 |

|   |            |            |            |
|---|------------|------------|------------|
| H | 0.7833289  | 1.9117637  | 35.8654970 |
| C | -2.0095369 | 10.6375416 | 41.0799924 |
| C | -1.6695058 | 12.4642419 | 39.5080368 |
| C | -5.2756611 | 12.1087844 | 39.5021987 |
| C | -6.0527452 | 9.8696119  | 38.9149871 |
| H | -7.2440048 | 13.1261678 | 34.8402280 |
| C | -7.9101055 | 11.0565932 | 34.9776049 |
| H | -8.2728700 | 8.9175247  | 35.1513607 |
| H | -3.2943965 | 5.0785673  | 39.0715299 |
| C | -2.5473111 | 3.1710687  | 39.8200044 |
| C | -0.1574755 | 3.0627322  | 40.2697097 |
| H | 0.9706750  | 4.8826042  | 39.9189024 |
| H | 1.4785595  | 8.6570895  | 38.9154497 |
| C | 2.0056317  | 8.9492367  | 40.9905565 |
| C | 0.6010323  | 7.8460099  | 42.6350008 |
| H | -1.0467520 | 6.6709125  | 41.8590852 |
| H | -1.4933629 | 0.8610898  | 35.8113237 |
| H | -2.4240304 | 9.6445966  | 41.3157290 |
| C | -1.2575435 | 11.3258007 | 42.0435980 |
| C | -0.9062280 | 13.1460959 | 40.4715169 |
| H | -1.8253207 | 12.9313559 | 38.5240069 |
| H | -4.4593975 | 12.8360098 | 39.6323464 |
| C | -6.5915759 | 12.4801263 | 39.8178644 |
| C | -7.3676187 | 10.2494396 | 39.2326665 |
| H | -5.8389091 | 8.8469518  | 38.5638961 |
| H | -8.9745408 | 11.3102854 | 34.8571388 |
| H | -3.5382803 | 2.6928175  | 39.7993001 |
| C | -1.4225610 | 2.4472589  | 40.2457116 |
| H | 0.7255476  | 2.4975069  | 40.6051820 |
| H | 2.8685568  | 9.5856050  | 40.7417323 |
| C | 1.7044896  | 8.6628449  | 42.3310108 |
| H | 0.3586012  | 7.6110048  | 43.6827829 |
| H | -1.0955155 | 10.8730730 | 43.0330813 |
| C | -0.7035206 | 12.5815758 | 41.7411933 |
| H | -0.4730086 | 14.1283664 | 40.2279578 |
| H | -6.7991974 | 13.4987452 | 40.1799335 |
| C | -7.6387995 | 11.5512197 | 39.6838942 |
| H | -8.1831242 | 9.5172440  | 39.1323994 |
| H | -1.5291255 | 1.3989265  | 40.5641857 |
| H | 2.3304563  | 9.0716623  | 43.1385056 |
| H | -0.1094712 | 13.1195623 | 42.4954540 |
| H | -8.6686741 | 11.8431103 | 39.9406884 |

**Table 9.** Cartesian coordinates of the optimized geometry of  $[\text{Cu}_3(\mu\text{-Cl})_2(\text{dpmp})_2\{(\mu_3, \eta^1\text{-}\eta^5\text{-As}_5)\text{FeCp}^*\}]^+$  at the BP86/def2-SVP level of theory.

| Atom | x          | y         | z          |
|------|------------|-----------|------------|
| As   | 0.8516740  | 7.0375531 | 26.4903572 |
| As   | -0.1556927 | 5.2124918 | 27.6094264 |
| As   | 0.3470778  | 5.4591975 | 29.8994652 |
| As   | 1.7009106  | 7.3722308 | 30.1688944 |
| As   | 2.0591457  | 8.3425368 | 28.0506521 |
| Cu   | 0.3891339  | 7.7287004 | 24.1310954 |
| Cu   | 1.2339149  | 7.6344127 | 20.8014881 |
| Cu   | 1.2576189  | 8.0125325 | 18.0921443 |
| Fe   | 2.2369461  | 5.8127276 | 28.2182704 |

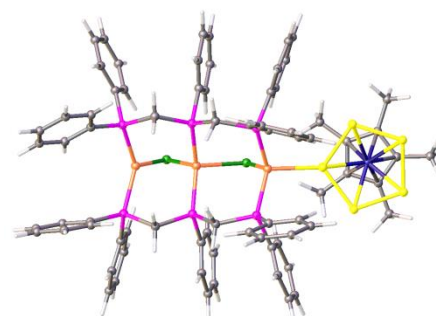

|    |            |            |            |
|----|------------|------------|------------|
| C1 | 2.1067386  | 6.6972010  | 22.8548698 |
| C1 | 2.8598214  | 6.7557936  | 19.1675095 |
| P  | -1.6705455 | 6.8499270  | 23.5652397 |
| P  | -0.7510305 | 6.5476869  | 20.5163452 |
| P  | -0.6093761 | 6.9055777  | 17.4280720 |
| P  | 1.6041809  | 10.2467661 | 17.9301256 |
| P  | 1.5993656  | 9.8759504  | 21.0304963 |
| P  | 0.6097142  | 10.0271267 | 24.0749944 |
| C  | 4.0255682  | 5.5893370  | 27.1365740 |
| C  | 4.3161386  | 5.7376118  | 28.5448656 |
| C  | 3.6657622  | 4.6569937  | 29.2523605 |
| C  | 2.9730543  | 3.8410759  | 28.2798991 |
| C  | 3.1952216  | 4.4171431  | 26.9728312 |
| C  | 4.6036797  | 6.4165403  | 26.0284748 |
| C  | 5.2393446  | 6.7533009  | 29.1486690 |
| C  | 3.8024616  | 4.3552391  | 30.7148144 |
| C  | 2.2643024  | 2.5500618  | 28.5618848 |
| C  | 2.7657700  | 3.8219090  | 25.6659417 |
| C  | -2.0978654 | 6.9891677  | 21.7433685 |
| C  | -1.7084560 | 6.9086898  | 18.9397474 |
| C  | 1.1221668  | 10.9749140 | 19.5837892 |
| C  | 0.5920148  | 10.7534884 | 22.3462768 |
| C  | -3.1527917 | 7.6213975  | 24.3638680 |
| C  | -4.2390989 | 8.1838173  | 23.6596550 |
| C  | -5.3279749 | 8.7414852  | 24.3533549 |
| C  | -5.3506099 | 8.7374262  | 25.7562018 |
| C  | -4.2727538 | 8.1802353  | 26.4662519 |
| C  | -3.1795375 | 7.6350633  | 25.7781298 |
| C  | -1.9182927 | 5.0510620  | 23.9130454 |
| C  | -3.1955993 | 4.4936635  | 24.1391283 |
| C  | -3.3294446 | 3.1180476  | 24.3858587 |
| C  | -2.1935340 | 2.2902209  | 24.4026047 |
| C  | -0.9216227 | 2.8417056  | 24.1770077 |
| C  | -0.7790263 | 4.2193845  | 23.9435051 |
| C  | -0.6582142 | 4.7068988  | 20.5385699 |
| C  | -1.8039324 | 3.8861099  | 20.4543091 |
| C  | -1.6727841 | 2.4900509  | 20.4531192 |
| C  | -0.3971900 | 1.9027459  | 20.5329811 |
| C  | 0.7446154  | 2.7145807  | 20.6165047 |
| C  | 0.6188296  | 4.1139475  | 20.6211502 |
| C  | -0.4534718 | 5.1380418  | 16.9228217 |
| C  | -1.5568523 | 4.4044994  | 16.4306073 |
| C  | -1.3897803 | 3.0726896  | 16.0241958 |
| C  | -0.1227258 | 2.4655526  | 16.0999779 |
| C  | 0.9748041  | 3.1905530  | 16.5898496 |
| C  | 0.8140561  | 4.5245537  | 17.0030652 |
| C  | -1.6901164 | 7.5997457  | 16.0960537 |
| C  | -2.8171900 | 8.4106157  | 16.3464395 |
| C  | -3.5600782 | 8.9501322  | 15.2819075 |
| C  | -3.1870512 | 8.6901283  | 13.9542039 |
| C  | -2.0606430 | 7.8896334  | 13.6940068 |
| C  | -1.3157443 | 7.3520605  | 14.7539581 |
| C  | 0.5989840  | 11.2279754 | 16.7327269 |
| C  | 0.0174154  | 12.4807707 | 17.0275404 |
| C  | -0.7042824 | 13.1780321 | 16.0432618 |
| C  | -0.8468529 | 12.6367976 | 14.7553893 |
| C  | -0.2742738 | 11.3888749 | 14.4550263 |



|   |            |            |            |
|---|------------|------------|------------|
| C | 0.4367585  | 10.6854834 | 15.4386141 |
| C | 3.3315290  | 10.8206149 | 17.6121524 |
| C | 3.6221713  | 12.1379939 | 17.1940628 |
| C | 4.9494875  | 12.5193471 | 16.9451837 |
| C | 5.9928950  | 11.5902017 | 17.1049772 |
| C | 5.7064075  | 10.2780599 | 17.5147365 |
| C | 4.3800564  | 9.8882172  | 17.7655217 |
| C | 3.3491430  | 10.3596938 | 21.3579905 |
| C | 3.7405231  | 11.7001991 | 21.5668149 |
| C | 5.0889623  | 12.0163839 | 21.7863982 |
| C | 6.0582703  | 10.9972595 | 21.7963791 |
| C | 5.6743882  | 9.6630891  | 21.5899088 |
| C | 4.3241865  | 9.3406645  | 21.3724987 |
| C | 2.1649443  | 10.7191418 | 24.7974049 |
| C | 2.2278140  | 12.0095926 | 25.3663298 |
| C | 3.4402205  | 12.4913361 | 25.8856360 |
| C | 4.5965845  | 11.6941829 | 25.8348231 |
| C | 4.5368552  | 10.4094715 | 25.2699385 |
| C | 3.3240611  | 9.9149538  | 24.7631630 |
| C | -0.7095028 | 11.0195607 | 24.9147883 |
| C | -1.0184990 | 10.6720360 | 26.2502411 |
| C | -1.9782170 | 11.3959174 | 26.9725862 |
| C | -2.6596884 | 12.4670434 | 26.3693184 |
| C | -2.3714311 | 12.8112951 | 25.0397439 |
| C | -1.3999499 | 12.0964529 | 24.3169350 |
| H | 4.7575009  | 7.4671273  | 26.3420992 |
| H | 3.9563121  | 6.4201511  | 25.1298492 |
| H | 5.5934782  | 6.0079102  | 25.7276606 |
| H | 6.2820894  | 6.3668778  | 29.1547176 |
| H | 4.9649534  | 6.9913057  | 30.1946354 |
| H | 5.2370998  | 7.7023744  | 28.5781453 |
| H | 4.6848203  | 3.7010517  | 30.8881504 |
| H | 2.9130286  | 3.8300344  | 31.1136748 |
| H | 3.9443938  | 5.2745513  | 31.3152381 |
| H | 1.4550201  | 2.3562811  | 27.8313567 |
| H | 1.8121579  | 2.5387637  | 29.5725613 |
| H | 2.9797186  | 1.7006157  | 28.5048558 |
| H | 3.5191880  | 3.0795571  | 25.3218041 |
| H | 2.6650435  | 4.5882369  | 24.8727411 |
| H | 1.7959705  | 3.2956491  | 25.7575026 |
| H | -2.2996690 | 8.0661565  | 21.5602611 |
| H | -3.0307700 | 6.4243198  | 21.5305466 |
| H | -2.0766585 | 7.9504376  | 19.0494460 |
| H | -2.5856013 | 6.2380223  | 18.8194922 |
| H | 0.0122180  | 11.0185821 | 19.5792005 |
| H | 1.5134275  | 12.0054793 | 19.7166759 |
| H | 0.8570193  | 11.8316372 | 22.3858273 |
| H | -0.4591624 | 10.6709293 | 21.9964505 |
| H | -4.2582813 | 8.1889194  | 22.5603296 |
| H | -6.1672065 | 9.1750894  | 23.7880931 |
| H | -6.2069018 | 9.1682841  | 26.2968332 |
| H | -4.2794856 | 8.1718414  | 27.5667373 |
| H | -2.3389893 | 7.2083696  | 26.3490523 |
| H | -4.0890630 | 5.1368536  | 24.1372715 |
| H | -4.3272642 | 2.6915543  | 24.5711435 |
| H | -2.3011673 | 1.2122035  | 24.5976796 |
| H | -0.0307619 | 2.1959173  | 24.1858186 |

|   |            |            |            |
|---|------------|------------|------------|
| H | 0.2173959  | 4.6580119  | 23.7763778 |
| H | -2.8116720 | 4.3272676  | 20.3926026 |
| H | -2.5703854 | 1.8565609  | 20.3895068 |
| H | -0.2968373 | 0.8064636  | 20.5281777 |
| H | 1.7450061  | 2.2594952  | 20.6759425 |
| H | 1.5114586  | 4.7541364  | 20.6846235 |
| H | -2.5470698 | 4.8793727  | 16.3466861 |
| H | -2.2514350 | 2.5065369  | 15.6384928 |
| H | 0.0069083  | 1.4228874  | 15.7716231 |
| H | 1.9672540  | 2.7188728  | 16.6509327 |
| H | 1.6707000  | 5.0913403  | 17.4018366 |
| H | -3.1377544 | 8.6270384  | 17.3763148 |
| H | -4.4415200 | 9.5734892  | 15.4963844 |
| H | -3.7748075 | 9.1068328  | 13.1223931 |
| H | -1.7621097 | 7.6751523  | 12.6563634 |
| H | -0.4424897 | 6.7176222  | 14.5343226 |
| H | 0.1260013  | 12.9296518 | 18.0262793 |
| H | -1.1519856 | 14.1542186 | 16.2850660 |
| H | -1.4083583 | 13.1868979 | 13.9851123 |
| H | -0.3898083 | 10.9540203 | 13.4511211 |
| H | 0.8666031  | 9.6990192  | 15.2030459 |
| H | 2.8100608  | 12.8660345 | 17.0438168 |
| H | 5.1694809  | 13.5461306 | 16.6148819 |
| H | 7.0321592  | 11.8902567 | 16.9008644 |
| H | 6.5191247  | 9.5457326  | 17.6347353 |
| H | 4.1543610  | 8.8575825  | 18.0843071 |
| H | 2.9967711  | 12.5132797 | 21.5639898 |
| H | 5.3853807  | 13.0634681 | 21.9500932 |
| H | 7.1167427  | 11.2485188 | 21.9648307 |
| H | 6.4294476  | 8.8621823  | 21.5943128 |
| H | 4.0203525  | 8.2961477  | 21.2075019 |
| H | 1.3251473  | 12.6374557 | 25.4170682 |
| H | 3.4797945  | 13.4948969 | 26.3364239 |
| H | 5.5457175  | 12.0746912 | 26.2423941 |
| H | 5.4406432  | 9.7834349  | 25.2253045 |
| H | 3.2703384  | 8.9027921  | 24.3321981 |
| H | -0.4981245 | 9.8298869  | 26.7339278 |
| H | -2.1973369 | 11.1162832 | 28.0141615 |
| H | -3.4156447 | 13.0320693 | 26.9354165 |
| H | -2.8998927 | 13.6483718 | 24.5581992 |
| H | -1.1857446 | 12.4001784 | 23.2821041 |

**Table 10.** Cartesian coordinates of the optimized geometry of  $[\text{Cu}_3(\mu\text{-Cl})_2(\text{dpmp})_2\{(\mu_3, \eta^2: \eta^5\text{-P}_5)\text{FeCp}^*\}]^+$  at the BP86/def2-SVP level of theory.

| Atom | x          | y          | z          |
|------|------------|------------|------------|
| Cu   | -1.7931841 | 7.9201070  | 32.1071069 |
| Cu   | -1.8822969 | 8.3837193  | 35.7558931 |
| Cu   | -1.2543327 | 9.0764322  | 38.2979081 |
| P    | -1.3872966 | 11.3392863 | 38.2153664 |
| P    | 0.6237264  | 7.8645088  | 38.7073787 |
| P    | -2.1695771 | 10.5917355 | 35.2936130 |
| P    | 0.0194703  | 7.1396071  | 35.7493888 |
| P    | 0.2818295  | 6.9332639  | 32.5427484 |
| P    | -1.8514382 | 10.3093074 | 32.0487306 |
| Cl   | -3.1565829 | 7.3619469  | 33.9939337 |

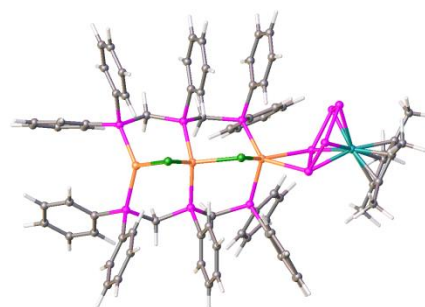

|    |            |            |            |
|----|------------|------------|------------|
| Cl | -3.1597308 | 7.8733224  | 37.7975282 |
| Fe | -3.8275153 | 6.1293702  | 28.6979081 |
| P  | -4.7986333 | 5.4956912  | 30.7860331 |
| P  | -3.8848558 | 7.4464419  | 30.6700534 |
| P  | -1.9305861 | 7.1888331  | 29.6863878 |
| P  | -1.7427591 | 5.1038776  | 29.1399017 |
| P  | -3.4867438 | 4.0644590  | 29.8561575 |
| C  | -5.5451062 | 6.9341153  | 27.7876923 |
| C  | -5.4042967 | 5.5366073  | 27.4430107 |
| C  | -4.3645099 | 7.6288037  | 27.3260263 |
| C  | -6.7462292 | 7.5682194  | 28.4220965 |
| C  | -4.1376070 | 5.3687293  | 26.7656228 |
| C  | -6.4330979 | 4.4684757  | 27.6592207 |
| C  | -3.4938588 | 6.6618606  | 26.6951288 |
| C  | -4.1289475 | 9.1068790  | 27.4038490 |
| H  | -7.4652753 | 7.8962563  | 27.6402400 |
| H  | -6.4724431 | 8.4581637  | 29.0214589 |
| H  | -7.2770475 | 6.8635721  | 29.0909625 |
| C  | -3.6296720 | 4.0960629  | 26.1581683 |
| H  | -7.1196054 | 4.4145071  | 26.7865399 |
| H  | -7.0479400 | 4.6657155  | 28.5584980 |
| H  | -5.9698115 | 3.4706011  | 27.7830223 |
| C  | -2.2015213 | 6.9657323  | 25.9988412 |
| H  | -3.0493686 | 9.3489958  | 27.4391934 |
| H  | -4.6009803 | 9.5538816  | 28.3000937 |
| H  | -4.5577442 | 9.6112995  | 26.5106707 |
| H  | -3.9722592 | 3.2066821  | 26.7216432 |
| H  | -2.5233936 | 4.0671919  | 26.1280540 |
| H  | -3.9979759 | 3.9947257  | 25.1141588 |
| H  | -2.3888868 | 7.2328685  | 24.9360842 |
| H  | -1.5156072 | 6.0968754  | 26.0103859 |
| H  | -1.6726046 | 7.8167471  | 26.4701901 |
| C  | 1.0741974  | 7.3038216  | 34.2060482 |
| C  | 0.2924683  | 5.0882437  | 32.5014812 |
| C  | 1.6550820  | 7.3975172  | 31.3859221 |
| C  | -1.4860636 | 11.2163174 | 33.6619896 |
| C  | -0.6335671 | 11.1660690 | 30.9403629 |
| C  | -3.4875321 | 11.0149553 | 31.5429021 |
| H  | 2.0090683  | 6.7092638  | 34.2939553 |
| H  | 1.3556688  | 8.3775037  | 34.1893671 |
| C  | 1.4820498  | 4.3450851  | 32.3307889 |
| C  | -0.9333316 | 4.4126533  | 32.6717575 |
| C  | 1.7299992  | 6.7578400  | 30.1255155 |
| C  | 2.5779680  | 8.4274313  | 31.6729469 |
| H  | -0.3823003 | 11.1551613 | 33.7724736 |
| H  | -1.7515063 | 12.2876142 | 33.5421396 |
| C  | -0.0514543 | 10.4211839 | 29.8923597 |
| C  | -0.2695090 | 12.5251729 | 31.0907295 |
| C  | -4.6485007 | 10.4438502 | 32.1122567 |
| C  | -3.6226872 | 12.0516544 | 30.5946101 |
| C  | 1.3465132  | 7.5701695  | 37.0089715 |
| C  | -0.2356728 | 5.3327792  | 36.0040356 |
| H  | 2.4442005  | 4.8607864  | 32.1870550 |
| C  | 1.4403593  | 2.9426113  | 32.3230390 |
| C  | -0.9662907 | 3.0080534  | 32.6760845 |
| H  | -1.8610035 | 4.9908936  | 32.8045790 |
| H  | 1.0260617  | 5.9500513  | 29.8741948 |

|   |            |            |            |
|---|------------|------------|------------|
| C | 2.7113318  | 7.1274497  | 29.1925413 |
| C | 3.5601165  | 8.7942490  | 30.7376006 |
| H | 2.5464827  | 8.9598994  | 32.6347089 |
| C | -1.2824608 | 11.8158490 | 36.4093186 |
| C | -3.9164943 | 11.1875659 | 35.3375485 |
| H | -0.3172861 | 9.3604496  | 29.7669041 |
| C | 0.8600959  | 11.0218282 | 29.0078596 |
| C | 0.6477532  | 13.1212146 | 30.2104391 |
| H | -0.7067558 | 13.1386834 | 31.8926107 |
| H | -4.5574856 | 9.6096508  | 32.8249159 |
| C | -5.9182553 | 10.9318048 | 31.7668559 |
| C | -4.8981346 | 12.5267002 | 30.2424869 |
| H | -2.7326073 | 12.4907841 | 30.1208409 |
| H | 1.7628506  | 8.5450725  | 36.6785320 |
| H | 2.1706356  | 6.8256871  | 37.0275195 |
| C | -1.5540716 | 4.8840601  | 36.2280910 |
| C | 0.8278727  | 4.4044365  | 36.0163868 |
| H | 2.3689470  | 2.3693728  | 32.1777891 |
| C | 0.2159018  | 2.2728656  | 32.4958703 |
| H | -1.9267564 | 2.4887220  | 32.8103852 |
| H | 2.7586396  | 6.6076984  | 28.2233593 |
| C | 3.6329710  | 8.1442512  | 29.4955481 |
| H | 4.2745196  | 9.5936116  | 30.9865788 |
| H | -1.6255035 | 12.8566754 | 36.2309885 |
| H | -0.2054931 | 11.7512347 | 36.1450919 |
| C | -4.2666148 | 12.5317859 | 35.0843973 |
| C | -4.9268022 | 10.2557293 | 35.6552650 |
| H | 1.3027868  | 10.4227868 | 28.1980978 |
| C | 1.2127603  | 12.3714965 | 29.1643761 |
| H | 0.9184872  | 14.1803477 | 30.3403551 |
| H | -6.8124505 | 10.4858693 | 32.2275145 |
| C | -6.0468866 | 11.9734499 | 30.8318638 |
| H | -4.9907975 | 13.3358518 | 29.5017000 |
| C | 0.4532309  | 6.1954957  | 39.4757065 |
| C | 2.0277556  | 8.5939869  | 39.6665619 |
| H | -2.3828089 | 5.6073314  | 36.2192158 |
| C | -1.8020208 | 3.5220240  | 36.4659573 |
| C | 0.5744345  | 3.0456156  | 36.2528573 |
| H | 1.8651316  | 4.7315180  | 35.8399842 |
| H | 0.1848984  | 1.1725530  | 32.4862486 |
| H | 4.4077992  | 8.4264905  | 28.7666968 |
| C | -0.0511610 | 12.3481181 | 38.9929335 |
| C | -2.9370060 | 12.1209032 | 38.8495789 |
| H | -3.4964164 | 13.2787635 | 34.8324401 |
| C | -5.6074494 | 12.9380549 | 35.1474481 |
| C | -6.2690194 | 10.6670441 | 35.7170296 |
| H | -4.6555907 | 9.2088767  | 35.8575328 |
| H | 1.9297668  | 12.8412441 | 28.4737783 |
| H | -7.0441151 | 12.3505845 | 30.5575387 |
| C | -0.8430292 | 5.6993268  | 39.7263999 |
| C | 1.5809670  | 5.4260073  | 39.8417792 |
| C | 3.1422423  | 9.2214070  | 39.0711795 |
| C | 1.9353488  | 8.5702420  | 41.0786229 |
| H | -2.8334468 | 3.1813275  | 36.6429812 |
| C | -0.7413353 | 2.6034108  | 36.4801521 |
| H | 1.4082473  | 2.3274639  | 36.2608805 |
| C | 0.3767105  | 11.9571320 | 40.2812074 |

|   |            |            |            |
|---|------------|------------|------------|
| C | 0.5366172  | 13.4830517 | 38.3920133 |
| C | -3.0165108 | 13.4981577 | 39.1521334 |
| C | -4.0599566 | 11.2923033 | 39.0612742 |
| H | -5.8709430 | 13.9878688 | 34.9483318 |
| C | -6.6109426 | 12.0050533 | 35.4644939 |
| H | -7.0499628 | 9.9332704  | 35.9685709 |
| H | -1.7223486 | 6.2927123  | 39.4282435 |
| C | -1.0068858 | 4.4456479  | 40.3408587 |
| C | 1.4095024  | 4.1748451  | 40.4517774 |
| H | 2.5975534  | 5.8118742  | 39.6666441 |
| H | 3.2482869  | 9.2608234  | 37.9768988 |
| C | 4.1463187  | 9.8001538  | 39.8670700 |
| C | 2.9402762  | 9.1456376  | 41.8699891 |
| H | 1.0769557  | 8.0808907  | 41.5656771 |
| H | -0.9365906 | 1.5365865  | 36.6689323 |
| H | -0.0578167 | 11.0607123 | 40.7512625 |
| C | 1.3561195  | 12.6956554 | 40.9617041 |
| C | 1.5262334  | 14.2144864 | 39.0715445 |
| H | 0.2247395  | 13.8130378 | 37.3896711 |
| H | -2.1386440 | 14.1487483 | 39.0172394 |
| C | -4.2117681 | 14.0403970 | 39.6488422 |
| C | -5.2532983 | 11.8432472 | 39.5576018 |
| H | -3.9970653 | 10.2156712 | 38.8340412 |
| H | -7.6626241 | 12.3262853 | 35.5163138 |
| H | -2.0209315 | 4.0656033  | 40.5369038 |
| C | 0.1151050  | 3.6849026  | 40.7050306 |
| H | 2.2909905  | 3.5810309  | 40.7384261 |
| H | 5.0127064  | 10.2780762 | 39.3849027 |
| C | 4.0508854  | 9.7622131  | 41.2666510 |
| H | 2.8578761  | 9.1055856  | 42.9670144 |
| H | 1.6769336  | 12.3794411 | 41.9653795 |
| C | 1.9335404  | 13.8260403 | 40.3580396 |
| H | 1.9761000  | 15.0977358 | 38.5926772 |
| H | -4.2662251 | 15.1135877 | 39.8878643 |
| C | -5.3312863 | 13.2140651 | 39.8519556 |
| H | -6.1247243 | 11.1913465 | 39.7214017 |
| H | -0.0161396 | 2.7063585  | 41.1918704 |
| H | 4.8421683  | 10.2084633 | 41.8877649 |
| H | 2.7051033  | 14.4030509 | 40.8900217 |
| H | -6.2648555 | 13.6410498 | 40.2493480 |

**Table 11. Cartesian coordinates of the optimized geometry of  $[\text{Cu}_3(\mu\text{-Cl})_2(\text{dpmp})_2\{(\mu_3, \eta^2:\eta^5\text{-As}_5)\text{FeCp}^*\}]^+$  at the BP86/def2-SVP level of theory.**

| Atom | x          | y          | z          |
|------|------------|------------|------------|
| As   | 2.3862544  | 5.5462275  | 25.0796838 |
| As   | 1.5642472  | 3.4616984  | 25.8669656 |
| As   | 0.4529523  | 3.8297392  | 27.9150719 |
| As   | 0.6579424  | 6.1115210  | 28.4702934 |
| As   | 1.8952460  | 7.1956703  | 26.7659443 |
| Cu   | 0.7026524  | 7.4638325  | 24.3795085 |
| Cu   | -1.9389174 | 9.9621332  | 23.7274559 |
| Cu   | -3.6465629 | 11.6931208 | 22.5368730 |
| Fe   | 2.7137709  | 4.9383701  | 27.5397865 |
| Cl   | -0.8969226 | 8.7984420  | 25.5527991 |
| Cl   | -3.6989115 | 11.2900943 | 24.8086220 |

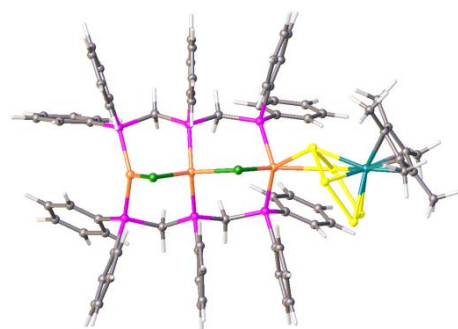

|   |            |            |            |
|---|------------|------------|------------|
| P | 2.0957019  | 9.0979228  | 23.2868157 |
| P | -0.2581321 | 11.3447659 | 23.0852987 |
| P | -2.2658129 | 13.3558562 | 21.8368704 |
| P | -4.8488761 | 10.3224513 | 21.1875477 |
| P | -2.9162282 | 8.2863923  | 22.5382649 |
| P | -0.5392730 | 6.1461147  | 22.9051780 |
| C | 4.7490060  | 5.4730135  | 27.6760822 |
| C | 4.0924460  | 5.6993959  | 28.9436033 |
| C | 3.5595932  | 4.4356459  | 29.4022004 |
| C | 3.8896593  | 3.4284718  | 28.4188319 |
| C | 4.6229707  | 4.0702136  | 27.3502890 |
| C | 5.5377484  | 6.4880235  | 26.9041205 |
| C | 4.0868248  | 6.9873737  | 29.7118366 |
| C | 2.9020355  | 4.1863595  | 30.7263353 |
| C | 3.6332351  | 1.9570446  | 28.5514563 |
| C | 5.2616853  | 3.3789135  | 26.1825771 |
| C | 1.2336545  | 10.4826434 | 22.3467337 |
| C | -0.6041969 | 12.5170686 | 21.6562870 |
| C | -3.8275180 | 8.7704842  | 20.9698006 |
| C | -1.7601398 | 7.0210988  | 21.7721286 |
| C | 3.2626171  | 8.4913447  | 21.9723616 |
| C | 3.3964651  | 9.0747834  | 20.6922481 |
| C | 4.3105469  | 8.5556480  | 19.7581401 |
| C | 5.1101657  | 7.4503827  | 20.0876088 |
| C | 4.9862487  | 6.8621377  | 21.3577904 |
| C | 4.0688779  | 7.3733780  | 22.2874301 |
| C | 3.2207060  | 10.0376452 | 24.4211139 |
| C | 4.5403045  | 10.3928914 | 24.0660390 |
| C | 5.3480489  | 11.1029515 | 24.9702008 |
| C | 4.8468317  | 11.4655967 | 26.2320306 |
| C | 3.5334470  | 11.1164024 | 26.5889853 |
| C | 2.7239580  | 10.3992941 | 25.6933100 |
| C | 0.4109372  | 12.4687821 | 24.3847647 |
| C | 1.4860091  | 13.3526945 | 24.1480065 |
| C | 1.9377458  | 14.2036889 | 25.1669384 |
| C | 1.3190419  | 14.1795102 | 26.4298670 |
| C | 0.2493930  | 13.3026948 | 26.6703070 |
| C | -0.2070969 | 12.4481607 | 25.6526102 |
| C | -1.9841251 | 14.7980281 | 22.9529648 |
| C | -1.2016867 | 15.9060938 | 22.5559264 |
| C | -1.0407732 | 16.9982098 | 23.4209072 |
| C | -1.6621762 | 16.9959176 | 24.6832915 |
| C | -2.4384112 | 15.8963417 | 25.0814659 |
| C | -2.6009624 | 14.7963606 | 24.2214044 |
| C | -2.5263433 | 14.1760840 | 20.1987490 |
| C | -1.8782936 | 13.7764429 | 19.0109529 |
| C | -2.1676595 | 14.4112244 | 17.7904418 |
| C | -3.1083806 | 15.4512866 | 17.7383139 |
| C | -3.7654522 | 15.8521001 | 18.9152225 |
| C | -3.4812099 | 15.2186335 | 20.1338781 |
| C | -5.1911934 | 10.8467595 | 19.4513138 |
| C | -5.0773468 | 9.9955572  | 18.3300767 |
| C | -5.3909473 | 10.4687843 | 17.0441181 |
| C | -5.8276071 | 11.7913589 | 16.8650456 |
| C | -5.9402546 | 12.6459347 | 17.9752432 |
| C | -5.6166077 | 12.1798658 | 19.2581249 |
| C | -6.4967770 | 9.7529210  | 21.7986760 |

|   |            |            |            |
|---|------------|------------|------------|
| C | -7.4650288 | 9.1876258  | 20.9398778 |
| C | -8.7078077 | 8.7839836  | 21.4518418 |
| C | -8.9944064 | 8.9453867  | 22.8189856 |
| C | -8.0357402 | 9.5127474  | 23.6740210 |
| C | -6.7900529 | 9.9216044  | 23.1691236 |
| C | -4.1773262 | 7.3230746  | 23.4773597 |
| C | -4.9477938 | 6.2949742  | 22.8919770 |
| C | -5.9288826 | 5.6327147  | 23.6441462 |
| C | -6.1485653 | 5.9905108  | 24.9865174 |
| C | -5.3804054 | 7.0066613  | 25.5754185 |
| C | -4.3966298 | 7.6731855  | 24.8262696 |
| C | -1.6114223 | 4.8590306  | 23.6768580 |
| C | -2.1585066 | 3.7876917  | 22.9344758 |
| C | -2.9989082 | 2.8543737  | 23.5594848 |
| C | -3.3117422 | 2.9907920  | 24.9240621 |
| C | -2.7805632 | 4.0603188  | 25.6614363 |
| C | -1.9254645 | 4.9893246  | 25.0445727 |
| C | 0.4826815  | 5.2195115  | 21.6670486 |
| C | 0.9313053  | 3.9082765  | 21.9486159 |
| C | 1.7866014  | 3.2383082  | 21.0585446 |
| C | 2.2131272  | 3.8642607  | 19.8762434 |
| C | 1.7872081  | 5.1725994  | 19.5943328 |
| C | 0.9359693  | 5.8462463  | 20.4844399 |
| H | 5.1189729  | 7.5076620  | 27.0095787 |
| H | 5.5691246  | 6.2495383  | 25.8234765 |
| H | 6.5873009  | 6.5165814  | 27.2705128 |
| H | 4.9857611  | 7.0485044  | 30.3635716 |
| H | 3.1953626  | 7.0753445  | 30.3627003 |
| H | 4.1003711  | 7.8679689  | 29.0404748 |
| H | 3.6671925  | 3.9308785  | 31.4916321 |
| H | 2.1836353  | 3.3451281  | 30.6782083 |
| H | 2.3505514  | 5.0758965  | 31.0876000 |
| H | 3.5381251  | 1.4633463  | 27.5649794 |
| H | 2.7058145  | 1.7494531  | 29.1197448 |
| H | 4.4737204  | 1.4692703  | 29.0918856 |
| H | 6.2962794  | 3.0633844  | 26.4405369 |
| H | 5.3249075  | 4.0405659  | 25.2967135 |
| H | 4.7004170  | 2.4727164  | 25.8828175 |
| H | 0.8389465  | 10.0098234 | 21.4223089 |
| H | 1.9969106  | 11.2317372 | 22.0461982 |
| H | -0.6843388 | 11.8720125 | 20.7560444 |
| H | 0.2186648  | 13.2454941 | 21.4941647 |
| H | -3.0460115 | 9.0272419  | 20.2233375 |
| H | -4.4285265 | 7.9267820  | 20.5703210 |
| H | -2.3309731 | 6.2553367  | 21.2040989 |
| H | -1.1595719 | 7.6015581  | 21.0413944 |
| H | 2.7993679  | 9.9513859  | 20.4046491 |
| H | 4.4013069  | 9.0284193  | 18.7680167 |
| H | 5.8281870  | 7.0482161  | 19.3568524 |
| H | 5.6032893  | 5.9915247  | 21.6269032 |
| H | 3.9738966  | 6.8884296  | 23.2718999 |
| H | 4.9448858  | 10.1094437 | 23.0829210 |
| H | 6.3769193  | 11.3718358 | 24.6853095 |
| H | 5.4827692  | 12.0203603 | 26.9389842 |
| H | 3.1323717  | 11.3987634 | 27.5738527 |
| H | 1.6961260  | 10.1262786 | 25.9774878 |
| H | 1.9857637  | 13.3845381 | 23.1663929 |

|   |            |            |            |
|---|------------|------------|------------|
| H | 2.7771991  | 14.8889846 | 24.9751071 |
| H | 1.6733639  | 14.8505292 | 27.2274529 |
| H | -0.2401422 | 13.2825304 | 27.6559064 |
| H | -1.0476035 | 11.7619648 | 25.8353752 |
| H | -0.7306428 | 15.9255416 | 21.5605187 |
| H | -0.4332990 | 17.8604711 | 23.1058080 |
| H | -1.5414739 | 17.8587523 | 25.3561845 |
| H | -2.9259610 | 15.8908841 | 26.0681083 |
| H | -3.1982096 | 13.9257049 | 24.5370781 |
| H | -1.1315107 | 12.9687041 | 19.0215492 |
| H | -1.6462529 | 14.0912927 | 16.8753967 |
| H | -3.3274564 | 15.9522077 | 16.7832692 |
| H | -4.5016401 | 16.6700517 | 18.8867493 |
| H | -3.9959271 | 15.5509133 | 21.0492841 |
| H | -4.7487217 | 8.9520083  | 18.4479171 |
| H | -5.2989424 | 9.7951475  | 16.1783315 |
| H | -6.0773131 | 12.1581196 | 15.8578678 |
| H | -6.2727477 | 13.6860689 | 17.8416129 |
| H | -5.6877189 | 12.8596325 | 20.1219039 |
| H | -7.2576212 | 9.0765953  | 19.8643801 |
| H | -9.4607269 | 8.3490198  | 20.7767386 |
| H | -9.9729787 | 8.6345503  | 23.2159335 |
| H | -8.2579335 | 9.6473351  | 24.7434060 |
| H | -6.0397157 | 10.3720457 | 23.8391564 |
| H | -4.7910146 | 5.9996504  | 21.8421340 |
| H | -6.5270403 | 4.8341346  | 23.1797789 |
| H | -6.9226323 | 5.4720286  | 25.5729020 |
| H | -5.5463781 | 7.2896823  | 26.6260007 |
| H | -3.7966309 | 8.4735888  | 25.2836390 |
| H | -1.9178493 | 3.6702249  | 21.8662180 |
| H | -3.4122114 | 2.0157080  | 22.9782964 |
| H | -3.9718237 | 2.2578012  | 25.4126734 |
| H | -3.0233184 | 4.1725631  | 26.7285860 |
| H | -1.5018625 | 5.8247142  | 25.6237054 |
| H | 0.6021744  | 3.3987412  | 22.8662476 |
| H | 2.1162219  | 2.2146030  | 21.2931535 |
| H | 2.8773538  | 3.3348547  | 19.1764704 |
| H | 2.1212533  | 5.6779162  | 18.6756989 |
| H | 0.6335627  | 6.8766868  | 20.2434137 |

## 1. References

- 
- [i] D. Li, H.-K. Yip, C.-M. Che, Z.-Y. Zhou, T. C. W. Mak, S.-T. Liu, *J. Chem. Soc., Dalton Trans.*, **1992**, 2445-2449.
- [ii] G. M. Sheldrick, *Acta Cryst. A*, **2008**, *64*, 112-122.
- [iii] a) A. Spek, *J. Appl. Cryst.*, **2003**, *36*, 7-13; b) P. van der Sluis, A. Spek, *Acta Cryst.*, **1990**, *A46*, 194-201.
- [iv] a) R. Ahlrichs, M. Bär, M. Häser, H. Horn, C. Kölmel, *Chem. Phys. Lett.*, **1989**, *162*, 165-169; b) O. Treutler, R. Ahlrichs, *J. Chem. Phys.*, **1995**, *102*, 346-354.



- 
- [v] a) K. Eichkorn, O. Treutler, H. Oehm, M. Häser, R. Ahlrichs, *Chem. Phys. Lett.*, **1995**, 242, 652–660; b) K. Eichkorn, F. Weigend, O. Treutler, R. Ahlrichs, *Theor. Chem. Acc.*, **1997**, 97, 119.
- [vi] a) P. A. M. Dirac, *Proc. Royal Soc. A*, **1929**, 123, 714-733. b) J. C. Slater, *Phys. Rev.*, **1951**, 81, 385-390. c) S. H. Vosko, L. Wilk, M. Nusair, *Can. J. Phys.*, **1980**, 58, 1200-1211. d) A. D. Becke, *Phys. Rev. A*, **1988**, 38, 3098. e) J. P. Perdew, *Phys. Rev. B*, **1986**, 33, 8822-8824.
- [vii] a) A. Schäfer, C. Huber, R. Ahlrichs, *J. Chem. Phys.*, **1994**, 100, 5829; b) K. Eichkorn, F. Weigend, O. Treutler, R. Ahlrichs, *Theor. Chem. Acc.*, **1997**, 97, 119.
- [viii] M. Sierka, A. Hogekamp, R. Ahlrichs, *J. Chem. Phys.*, **2003**, 118, 9136.
